# Supplementary material for: Alignment free sequence comparison methods and reservoir host prediction
Source: Oxford University Press journal article supplement (doi:10.1093/bioinformatics/btab338), 2021-04-30
Supplement: btab338_supplementary_data.zip [file btab338_supplementary_data.zip]

Archive with 2 entries (2 files):
- Lee-ResHostPred-Final-Sup_Tables_4_5.xlsx
- Lee-ResHostPred-Sup-Final.pdf
