# Supplementary material for: Alignment free sequence comparison methods and reservoir host prediction
Source: Oxford University Press journal article supplement (doi:10.1093/bioinformatics/btab338), 2021-04-30
Supplement: btab338_supplementary_data.zip [file btab338_supplementary_data.zip › Lee-ResHostPred-Final-Sup_Tables_4_5.xlsx]

## Sheet: Sheet1
Supplementary Table 4. Performance for each of the 437 viruses was evaluated by two methods. (a) The overall top 25% of the 550 trained models were selected. For an individual virus, the bagged prediction accuracy was calculated by selecting from these models all which had the particular virus in the test set. (2) The performance of the models was defined by selecting the top 25% of all models th…
(a) Bagged prediction by method 1 (overall best 25%)																(b) Bagged prediction by method 2 (best 25% for each focal virus)
Virus Name	Artiodactyl	Bat	Bird	Carnivore	Fish	Insect	Plant	Primate	Rodent	Predicted host	Viral group	True host	Score			Virus Name	Artiodactyl	Bat	Bird	Carnivore	Fish	Insect	Plant	Primate	Rodent	Predicted host	Viral group	True host	Score
Achimota virus 1	0.00664087	0.952557	0.00640764	0.00681598	0.00510381	0.00548908	0.00508329	0.00597395	0.00592877	Bat	Paramyxovirus	Bat	1			Achimota virus 1	0.00747092	0.946627	0.00720859	0.00766798	0.00574178	0.00617521	0.0057187	0.00672044	0.00666915	Bat	Paramyxovirus	Bat	1
Achimota virus 2	0.00516948	0.959736	0.00506596	0.00524603	0.00484538	0.00484017	0.0048474	0.00509566	0.00515387	Bat	Paramyxovirus	Bat	1			Achimota virus 2	0.00471998	0.963237	0.00462545	0.00478989	0.00442404	0.00441928	0.00442589	0.00465266	0.00470572	Bat	Paramyxovirus	Bat	1
Aedes flavivirus	0.0138482	0.0123858	0.0108947	0.013481	0.0100915	0.90606	0.00981573	0.0122942	0.0111286	Insect	Flavivirus	Insect	1			Aedes flavivirus	0.0132153	0.0134673	0.0120439	0.0142549	0.0112865	0.899828	0.0108251	0.0129305	0.0121489	Insect	Flavivirus	Insect	1
African bat icavirus A	0.0104891	0.53397	0.280188	0.0731787	0.00800062	0.00723561	0.00716435	0.0719513	0.00782197	Bat	Picornavirus	Bat	1			African bat icavirus A	0.0144569	0.463275	0.315255	0.0763962	0.00859668	0.00692364	0.00679208	0.0989676	0.00933626	Bat	Picornavirus	Bat	1
Akabane virus	0.940968	0.00791569	0.00183002	0.00224057	0.00174052	0.00857156	0.00175294	0.0174813	0.0174998	Artiodactyl	Bunyavirus	Artiodactyl	1			Akabane virus	0.943421	0.00758587	0.0017538	0.00214723	0.001668	0.00821441	0.00167991	0.016753	0.0167765	Artiodactyl	Bunyavirus	Artiodactyl	1
Allpahuayo virus	0.00949746	0.0101805	0.00938335	0.00942631	0.00935793	0.00949484	0.00935286	0.00962067	0.923686	Rodent	Arenavirus	Rodent	1			Allpahuayo virus	0.00949746	0.0101805	0.00938335	0.00942631	0.00935793	0.00949484	0.00935286	0.00962067	0.923686	Rodent	Arenavirus	Rodent	1
Alpaca respiratory coronavirus	0.751709	0.104007	0.00347155	0.00433578	0.00314138	0.00315331	0.00311222	0.123674	0.00339566	Artiodactyl	Coronavirus	Artiodactyl	1			Alpaca respiratory coronavirus	0.711993	0.120646	0.00402699	0.00502945	0.003644	0.00365784	0.00361017	0.143453	0.00393897	Artiodactyl	Coronavirus	Artiodactyl	1
Alphacoronavirus 2	0.0577775	0.79137	0.013109	0.060217	0.00950882	0.0101158	0.0093497	0.0336348	0.0149179	Bat	Coronavirus	Carnivore	0			Alphacoronavirus 2	0.0546491	0.7295	0.0171085	0.103895	0.0139476	0.0144144	0.0137723	0.0343242	0.0183892	Bat	Coronavirus	Carnivore	0
Amapari virus	0.0127158	0.0186691	0.0119224	0.0115696	0.0118263	0.011441	0.011325	0.0115841	0.898947	Rodent	Arenavirus	Rodent	1			Amapari virus	0.0119507	0.0180304	0.0113357	0.0107352	0.0114841	0.0106432	0.0105362	0.0107484	0.904536	Rodent	Arenavirus	Rodent	1
American bat vesiculovirus TFFN-2013	0.0703395	0.0601218	0.0036381	0.00889921	0.795155	0.0175056	0.00195544	0.00664488	0.0357401	Fish	Rhabdovirus	Bat	0			American bat vesiculovirus TFFN-2013	0.0542337	0.0953189	0.00942009	0.00943078	0.765767	0.0213039	0.0042474	0.00915767	0.0311208	Fish	Rhabdovirus	Bat	0
Andes virus	0.00605181	0.00616952	0.00604701	0.00605941	0.00602612	0.00602837	0.00602728	0.00613926	0.951451	Rodent	Bunyavirus	Rodent	1			Andes virus	0.0078508	0.0128113	0.00799935	0.00808764	0.0076514	0.00765045	0.00765153	0.0083893	0.931908	Rodent	Bunyavirus	Rodent	1
Apoi virus	0.00574983	0.206727	0.00648356	0.00492942	0.0049016	0.00493276	0.00489042	0.010694	0.750691	Rodent	Flavivirus	Rodent	1			Apoi virus	0.0063543	0.175855	0.00716604	0.0054483	0.00541756	0.00545199	0.00540521	0.0118192	0.777083	Rodent	Flavivirus	Rodent	1
Aravan virus	0.00794405	0.775996	0.0079151	0.166432	0.00946439	0.00851071	0.00774749	0.00793768	0.00805301	Bat	Rhabdovirus	Bat	1			Aravan virus	0.00830458	0.765854	0.00827488	0.173957	0.0098941	0.00889754	0.00809965	0.00829847	0.00841905	Bat	Rhabdovirus	Bat	1
Arenavirus H0030026	0.0114294	0.0118521	0.0110016	0.0109792	0.0111628	0.0110541	0.0108551	0.0112539	0.910412	Rodent	Arenavirus	Rodent	1			Arenavirus H0030026	0.0114294	0.0118521	0.0110016	0.0109792	0.0111628	0.0110541	0.0108551	0.0112539	0.910412	Rodent	Arenavirus	Rodent	1
Aroa virus	0.00508538	0.00265394	0.958768	0.00180575	0.00182535	0.00222094	0.00162027	0.0234121	0.00260828	Bird	Flavivirus	Rodent	0			Aroa virus	0.00481778	0.00251426	0.960927	0.00171071	0.00172928	0.00210405	0.001535	0.022191	0.00247101	Bird	Flavivirus	Rodent	0
Arumowot virus	0.00240304	0.739147	0.000191245	0.00187913	0.000370411	0.00210819	0.00238964	0.231648	0.0198635	Bat	Bunyavirus	Rodent	0			Arumowot virus	0.0100213	0.676851	0.00733496	0.0242167	0.00766082	0.0122989	0.0087281	0.22487	0.0280181	Bat	Bunyavirus	Rodent	0
Astrovirus MLB1	0.00986871	0.00811838	0.0079099	0.00992795	0.00727774	0.00730573	0.00724341	0.931756	0.0105923	Primate	Astrovirus	Primate	1			Astrovirus MLB1	0.012442	0.0102362	0.00997332	0.0125059	0.00917629	0.00921157	0.00913299	0.913966	0.0133554	Primate	Astrovirus	Primate	1
Astrovirus MLB2	0.00638459	0.00193173	0.00254813	0.00271384	0.000923376	0.00114918	0.000916938	0.981577	0.00185482	Primate	Astrovirus	Primate	1			Astrovirus MLB2	0.00737872	0.00227227	0.00299764	0.00319149	0.00108632	0.00135198	0.00107875	0.978461	0.00218182	Primate	Astrovirus	Primate	1
Astrovirus MLB3	0.00380702	0.0021311	0.00255467	0.00204471	0.00103478	0.00130922	0.00109589	0.983505	0.00251722	Primate	Astrovirus	Primate	1			Astrovirus MLB3	0.00518497	0.00290622	0.00348629	0.00277617	0.00141169	0.00172889	0.00149711	0.977613	0.00339605	Primate	Astrovirus	Primate	1
Astrovirus VA1	0.00427512	0.00127355	0.0011852	0.00489872	0.00142778	0.00107624	0.00104375	0.98267	0.00214939	Primate	Astrovirus	Primate	1			Astrovirus VA1	0.00599178	0.00275392	0.00268364	0.00751191	0.00327855	0.00258707	0.00230051	0.969384	0.00350885	Primate	Astrovirus	Primate	1
Astrovirus VA3	0.00206309	0.000815622	0.00127106	0.00163545	0.000423852	0.000559755	0.000432127	0.991925	0.000874052	Primate	Astrovirus	Primate	1			Astrovirus VA3	0.00195509	0.000772825	0.00120418	0.00155113	0.000401544	0.000530302	0.000409385	0.992347	0.000828152	Primate	Astrovirus	Primate	1
Astrovirus VA4	0.0157696	0.0112052	0.0114609	0.0124501	0.0097855	0.00998365	0.00975797	0.90777	0.0118175	Primate	Astrovirus	Primate	1			Astrovirus VA4	0.0157664	0.0127249	0.0132613	0.0141608	0.011444	0.0115739	0.0114082	0.896107	0.0135537	Primate	Astrovirus	Primate	1
Astrovirus wild boar/WBAstV-1/2011/HUN	0.893932	0.00575094	0.015516	0.0411647	0.00304933	0.00309811	0.0029715	0.0266481	0.0078688	Artiodactyl	Astrovirus	Artiodactyl	1			Astrovirus wild boar/WBAstV-1/2011/HUN	0.921092	0.00364933	0.00673511	0.0361178	0.001175	0.0012626	0.00117314	0.0249282	0.00386704	Artiodactyl	Astrovirus	Artiodactyl	1
Atlantic salmon calicivirus	0.00741539	0.060817	0.0200324	0.00427693	0.134921	0.690001	0.00200206	0.0325976	0.0479361	Insect	Calicivirus	Fish	0			Atlantic salmon calicivirus	0.0111622	0.0636593	0.0244071	0.00800561	0.12757	0.676216	0.00529695	0.0335407	0.0501425	Insect	Calicivirus	Fish	0
Atlantic salmon paramyxovirus	0.123485	0.0814264	0.0737065	0.0286777	0.014798	0.00264134	0.00291132	0.366068	0.306285	Primate	Paramyxovirus	Fish	0			Atlantic salmon paramyxovirus	0.110009	0.0671965	0.159905	0.0273149	0.0183591	0.00700116	0.00723274	0.343058	0.259923	Primate	Paramyxovirus	Fish	0
Avastrovirus 1	0.0734336	0.0113176	0.840597	0.0100604	0.0081004	0.00799913	0.00797486	0.0315619	0.00895536	Bird	Astrovirus	Bird	1			Avastrovirus 1	0.063035	0.00942806	0.864697	0.0083384	0.00659025	0.00650879	0.00647351	0.0274117	0.0075169	Bird	Astrovirus	Bird	1
Avastrovirus 3	0.02714	0.00723312	0.836711	0.00872094	0.00616963	0.0052698	0.00520593	0.0960834	0.00746665	Bird	Astrovirus	Bird	1			Avastrovirus 3	0.02714	0.00723312	0.836711	0.00872094	0.00616963	0.0052698	0.00520593	0.0960834	0.00746665	Bird	Astrovirus	Bird	1
Avian encephalomyelitis virus	0.00946159	0.789197	0.151205	0.00794006	0.0071196	0.00750254	0.00713172	0.011358	0.00908508	Bat	Picornavirus	Bird	0			Avian encephalomyelitis virus	0.00791563	0.81109	0.140464	0.00648044	0.00569951	0.00604367	0.00570914	0.0093484	0.00724908	Bat	Picornavirus	Bird	0
Avian hepatitis E virus	0.0460949	0.372721	0.0272823	0.112599	0.0194917	0.0168536	0.0139005	0.253757	0.1373	Bat	Hepevirus	Bird	0			Avian hepatitis E virus	0.0486222	0.334497	0.0303913	0.11515	0.0204643	0.0169537	0.0143001	0.29597	0.123651	Bat	Hepevirus	Bird	0
Avian metapneumovirus	0.0642612	0.0161719	0.0934922	0.0191452	0.0138707	0.00798208	0.00617907	0.665808	0.11309	Primate	Paramyxovirus	Bird	0			Avian metapneumovirus	0.0653186	0.0157982	0.0890516	0.018375	0.0133417	0.00760794	0.00593249	0.64056	0.144015	Primate	Paramyxovirus	Bird	0
Avian paramyxovirus 11	0.0184183	0.0184489	0.858388	0.0173548	0.0168206	0.0176949	0.0168214	0.0178854	0.0181675	Bird	Paramyxovirus	Bird	1			Avian paramyxovirus 11	0.0184141	0.0180866	0.859602	0.0171973	0.0167016	0.0180516	0.0165496	0.0175046	0.0178929	Bird	Paramyxovirus	Bird	1
Avian paramyxovirus 12	0.00322382	0.00670482	0.969543	0.0029464	0.00290898	0.00393851	0.00256513	0.00418825	0.00398132	Bird	Paramyxovirus	Bird	1			Avian paramyxovirus 12	0.0058722	0.00954735	0.94743	0.00608733	0.00531288	0.00665025	0.00484031	0.00722968	0.00702977	Bird	Paramyxovirus	Bird	1
Avian paramyxovirus 3	0.00907913	0.00644787	0.941012	0.00839895	0.00638594	0.00649821	0.00653979	0.00772464	0.00791391	Bird	Paramyxovirus	Bird	1			Avian paramyxovirus 3	0.00642809	0.00461619	0.958014	0.00595233	0.00448484	0.00472757	0.00459563	0.00555539	0.00562564	Bird	Paramyxovirus	Bird	1
Avian paramyxovirus 4	0.000125801	0.0795586	0.918258	0.000181778	4.71148e-05	0.000196761	3.61298e-05	0.00145053	0.000144847	Bird	Paramyxovirus	Bird	1			Avian paramyxovirus 4	0.0039303	0.0555677	0.924871	0.00243208	0.0022342	0.00311989	0.00193141	0.00361717	0.00229627	Bird	Paramyxovirus	Bird	1
Avian paramyxovirus 5	0.000109278	0.000342331	0.999428	6.67597e-06	4.40644e-07	2.91579e-06	3.59643e-07	9.96426e-05	1.02166e-05	Bird	Paramyxovirus	Bird	1			Avian paramyxovirus 5	0.000130907	0.000410563	0.999315	8.00893e-06	5.28409e-07	3.48987e-06	4.31249e-07	0.000118588	1.22517e-05	Bird	Paramyxovirus	Bird	1
Avian paramyxovirus 6	0.00701872	0.00618038	0.945921	0.00628984	0.0102025	0.00583707	0.00579245	0.00658434	0.00617359	Bird	Paramyxovirus	Bird	1			Avian paramyxovirus 6	0.00701872	0.00618038	0.945921	0.00628984	0.0102025	0.00583707	0.00579245	0.00658434	0.00617359	Bird	Paramyxovirus	Bird	1
Avian paramyxovirus 7	3.92681e-06	0.00807299	0.991907	2.20133e-06	8.22811e-07	2.57376e-07	2.2242e-08	5.37729e-06	7.41903e-06	Bird	Paramyxovirus	Bird	1			Avian paramyxovirus 7	4.82152e-06	0.0104942	0.989495	1.00223e-06	9.23928e-07	1.5319e-07	2.39942e-08	1.79405e-06	1.95688e-06	Bird	Paramyxovirus	Bird	1
Avian paramyxovirus 8	0.00207611	0.0037041	0.982272	0.00238663	0.00166881	0.00172447	0.00217386	0.00172254	0.00227166	Bird	Paramyxovirus	Bird	1			Avian paramyxovirus 8	0.00228371	0.0040745	0.980499	0.00262529	0.00183569	0.00189691	0.00239124	0.00189474	0.00249883	Bird	Paramyxovirus	Bird	1
Avian paramyxovirus 9	0.00756252	0.0103932	0.943448	0.00680007	0.00655931	0.00668392	0.00570784	0.00626581	0.00657902	Bird	Paramyxovirus	Bird	1			Avian paramyxovirus 9	0.0112065	0.013091	0.927125	0.00855585	0.00773049	0.00836595	0.00696846	0.00769021	0.00926644	Bird	Paramyxovirus	Bird	1
Avian paramyxovirus penguin	0.000982749	0.026138	0.965555	0.00150825	0.000759343	0.00124107	0.000674171	0.000990262	0.00215126	Bird	Paramyxovirus	Bird	1			Avian paramyxovirus penguin	0.000249252	0.0318064	0.965774	0.000717461	0.000167384	0.00021102	0.000122676	0.000367126	0.000584981	Bird	Paramyxovirus	Bird	1
Avisivirus Pf-CHK1/AsV	0.00841365	0.00852944	0.936929	0.00760539	0.00733218	0.00778187	0.00729187	0.00866525	0.00745154	Bird	Picornavirus	Bird	1			Avisivirus Pf-CHK1/AsV	0.00629554	0.00656127	0.953105	0.00563428	0.0053851	0.00570617	0.00534108	0.00647262	0.00549885	Bird	Picornavirus	Bird	1
Babanki virus	0.00849201	0.00723837	0.933677	0.00753062	0.00847667	0.0115833	0.00692156	0.00837607	0.0077044	Bird	Togavirus	Bird	1			Babanki virus	0.0095997	0.00817835	0.928164	0.00838346	0.00971761	0.00987675	0.00795743	0.00942945	0.0086931	Bird	Togavirus	Bird	1
Bagaza virus	0.0178486	0.00897913	0.78129	0.00588459	0.0216336	0.0102742	0.00602448	0.0100322	0.138033	Bird	Flavivirus	Bird	1			Bagaza virus	0.0178486	0.00897913	0.78129	0.00588459	0.0216336	0.0102742	0.00602448	0.0100322	0.138033	Bird	Flavivirus	Bird	1
Bastrovirus 7	0.0300851	0.00875355	0.00817642	0.121052	0.0122866	0.0389218	0.00542507	0.146513	0.628786	Rodent	Astrovirus	Primate	0			Bastrovirus 7	0.0300851	0.00875355	0.00817642	0.121052	0.0122866	0.0389218	0.00542507	0.146513	0.628786	Rodent	Astrovirus	Primate	0
Bastrovirus BAS-3	0.166334	0.00736381	0.0118393	0.0135747	0.388172	0.0308429	0.00673575	0.0250954	0.350042	Fish	Astrovirus	Rodent	0			Bastrovirus BAS-3	0.183325	0.00980638	0.0183825	0.0151931	0.329326	0.0350735	0.00819725	0.0389356	0.361761	Rodent	Astrovirus	Rodent	1
Bat coronavirus 133	0.0104958	0.922172	0.00882146	0.00921228	0.00841488	0.00857085	0.0084143	0.0153195	0.00857933	Bat	Coronavirus	Bat	1			Bat coronavirus 133	0.00968182	0.928334	0.00812428	0.00847847	0.00774344	0.00788697	0.00774291	0.0141074	0.0079007	Bat	Coronavirus	Bat	1
Bat coronavirus 1A	0.023738	0.776599	0.00709249	0.0208173	0.0066232	0.00529581	0.00499376	0.148765	0.00607542	Bat	Coronavirus	Bat	1			Bat coronavirus 1A	0.0242004	0.816275	0.00640566	0.0193451	0.0069767	0.00529519	0.00518882	0.110313	0.00599918	Bat	Coronavirus	Bat	1
Bat coronavirus 1B	0.047576	0.866145	0.00573366	0.0259878	0.000915809	0.00112544	0.000802992	0.0502858	0.00142754	Bat	Coronavirus	Bat	1			Bat coronavirus 1B	0.0325341	0.875171	0.00447121	0.0177582	0.000703819	0.00188864	0.00057879	0.065658	0.00123652	Bat	Coronavirus	Bat	1
Bat coronavirus 512	0.023541	0.898574	0.00990213	0.00989928	0.00839367	0.00834726	0.0083154	0.0239892	0.00903826	Bat	Coronavirus	Bat	1			Bat coronavirus 512	0.0245219	0.894348	0.0103147	0.0103115	0.0087434	0.00869506	0.00866188	0.0249887	0.00941485	Bat	Coronavirus	Bat	1
Bat coronavirus BM48-31	0.00367055	0.982769	0.00174975	0.00223291	0.00151641	0.001493	0.00141897	0.00307718	0.00207245	Bat	Coronavirus	Bat	1			Bat coronavirus BM48-31	0.00400409	0.981203	0.00190881	0.00243576	0.00165427	0.00162873	0.00154796	0.0033569	0.00226085	Bat	Coronavirus	Bat	1
Bat coronavirus CDPHE15	0.0219176	0.910216	0.00651752	0.00867814	0.0043205	0.00439357	0.00427794	0.0344538	0.00522503	Bat	Coronavirus	Bat	1			Bat coronavirus CDPHE15	0.0157883	0.920624	0.00516042	0.00614108	0.00401793	0.00403671	0.00398069	0.0355216	0.00472904	Bat	Coronavirus	Bat	1
Bat coronavirus HKU10	0.054747	0.861491	0.00986232	0.011635	0.00801161	0.00802678	0.00800999	0.0297819	0.00843443	Bat	Coronavirus	Bat	1			Bat coronavirus HKU10	0.0565171	0.862346	0.00877227	0.0106041	0.00697221	0.00698651	0.00697078	0.0334804	0.00735109	Bat	Coronavirus	Bat	1
Bat coronavirus HKU4	0.0134403	0.921303	0.00979967	0.00871137	0.00801271	0.0082086	0.00799106	0.0143404	0.0081929	Bat	Coronavirus	Bat	1			Bat coronavirus HKU4	0.0119471	0.930047	0.00871082	0.00774346	0.0071224	0.00729653	0.00710316	0.012747	0.00728258	Bat	Coronavirus	Bat	1
Bat coronavirus HKU5	0.0678191	0.931057	0.000282512	0.000310532	5.84733e-05	3.46803e-05	2.00508e-05	0.000264214	0.000153534	Bat	Coronavirus	Bat	1			Bat coronavirus HKU5	0.0708583	0.927953	0.000299114	0.000327676	6.19129e-05	3.67203e-05	2.12303e-05	0.00027968	0.000162559	Bat	Coronavirus	Bat	1
Bat coronavirus HKU9	0.0849865	0.830339	0.0617497	0.00607225	0.000501771	0.000442852	0.000392453	0.00880116	0.00671406	Bat	Coronavirus	Bat	1			Bat coronavirus HKU9	0.0912556	0.818411	0.0654484	0.00656248	0.000547057	0.00048279	0.000427802	0.00954749	0.0073178	Bat	Coronavirus	Bat	1
Bat hepatovirus	0.00514119	0.0743261	0.58784	0.309064	0.00303637	0.00345668	0.00278703	0.00460835	0.00974037	Bird	Picornavirus	Bat	0			Bat hepatovirus	0.00446968	0.0872676	0.618453	0.269263	0.0026385	0.00299357	0.00241554	0.00402373	0.008475	Bird	Picornavirus	Bat	0
Bat hepevirus	0.0758999	0.0550614	0.0503157	0.0325867	0.0251272	0.0140845	0.0137175	0.633971	0.0992359	Primate	Hepevirus	Bat	0			Bat hepevirus	0.07415	0.0360266	0.0657071	0.0500823	0.0192223	0.00940337	0.00909327	0.629912	0.106403	Primate	Hepevirus	Bat	0
Bat Paramyxovirus Eid_hel	0.00593526	0.528636	0.00203561	0.0037035	0.00242765	0.00169661	0.0016345	0.00424158	0.449689	Bat	Paramyxovirus	Bat	1			Bat Paramyxovirus Eid_hel	0.00465788	0.516715	0.00179906	0.0030365	0.00296218	0.00151948	0.0014805	0.00332496	0.464504	Bat	Paramyxovirus	Bat	1
Bat picornavirus 1	0.0791012	0.557577	0.178464	0.0894895	0.0105518	0.00802853	0.0123266	0.0517747	0.0126868	Bat	Picornavirus	Bat	1			Bat picornavirus 1	0.0853287	0.557723	0.17956	0.0982789	0.0115994	0.00883134	0.0135591	0.0311705	0.0139488	Bat	Picornavirus	Bat	1
Bat picornavirus 2	0.0795924	0.818473	0.00984037	0.0115411	0.00632727	0.00635269	0.00631649	0.0550008	0.00655591	Bat	Picornavirus	Bat	1			Bat picornavirus 2	0.0731385	0.834412	0.009038	0.0109634	0.0056918	0.00572302	0.00568154	0.049397	0.00595477	Bat	Picornavirus	Bat	1
Bat picornavirus 3	0.0429868	0.637887	0.0194718	0.184437	0.0165817	0.0166652	0.0161739	0.0398187	0.0259782	Bat	Picornavirus	Bat	1			Bat picornavirus 3	0.0470633	0.603466	0.0213231	0.201962	0.0181604	0.0182516	0.0177138	0.0436084	0.0284515	Bat	Picornavirus	Bat	1
Bat sapovirus TLC58 HK	0.273592	0.0086772	0.0190928	0.0634023	0.00588225	0.00542586	0.00437209	0.557364	0.0621923	Primate	Calicivirus	Bat	0			Bat sapovirus TLC58 HK	0.278031	0.00819144	0.0243468	0.0568528	0.00527227	0.00487618	0.00391887	0.561939	0.0565715	Primate	Calicivirus	Bat	0
Bean necrotic mosaic virus	0.0125332	0.00451914	0.0109975	0.0400203	0.00632754	0.0138314	0.895649	0.00605159	0.0100708	Plant	Bunyavirus	Plant	1			Bean necrotic mosaic virus	0.0134723	0.00544182	0.00751662	0.023757	0.00777879	0.0137733	0.910481	0.00703554	0.0107435	Plant	Bunyavirus	Plant	1
Bear canyon virus	3.79675e-05	0.000474043	1.72514e-05	0.000190529	5.48557e-06	2.13366e-05	7.36893e-06	5.25882e-05	0.999193	Rodent	Arenavirus	Rodent	1			Bear canyon virus	0.000764792	0.0020668	7.83729e-05	0.000273173	1.42376e-05	3.6615e-05	1.66061e-05	6.93734e-05	0.99668	Rodent	Arenavirus	Rodent	1
Beilong virus	0.0017599	0.00218551	0.00156336	0.00182382	0.00133021	0.00132788	0.00132128	0.00182696	0.986861	Rodent	Paramyxovirus	Rodent	1			Beilong virus	0.0021196	0.00252885	0.00189063	0.0022032	0.00161014	0.00160721	0.00159934	0.00220643	0.984235	Rodent	Paramyxovirus	Rodent	1
Berrimah virus	0.967232	0.00665633	0.000397597	0.000746277	0.00103152	0.0196173	0.000319115	0.00102664	0.00297295	Artiodactyl	Rhabdovirus	Artiodactyl	1			Berrimah virus	0.98108	0.00720064	0.000439446	0.000824718	0.0011401	0.00456513	0.000352706	0.00113465	0.00326224	Artiodactyl	Rhabdovirus	Artiodactyl	1
Betacoronavirus HKU24	0.00695295	0.0057254	0.0128361	0.00303012	0.00127147	0.00146448	0.00138831	0.00380047	0.963531	Rodent	Coronavirus	Rodent	1			Betacoronavirus HKU24	0.00378405	0.00261843	0.0133873	0.00272167	0.00133269	0.00152005	0.0014599	0.00352543	0.96965	Rodent	Coronavirus	Rodent	1
Big brushy tank virus	0.0141331	0.0155184	0.0135655	0.0134846	0.0129045	0.0129383	0.0132828	0.0147483	0.889424	Rodent	Arenavirus	Rodent	1			Big brushy tank virus	0.0154304	0.0161613	0.014458	0.0149009	0.0142945	0.0143087	0.014664	0.0160317	0.879751	Rodent	Arenavirus	Rodent	1
Bokeloh bat lyssavirus	0.00790785	0.935711	0.00784278	0.00785501	0.00923517	0.00772869	0.00777941	0.00795587	0.00798395	Bat	Rhabdovirus	Bat	1			Bokeloh bat lyssavirus	0.0093456	0.924025	0.00926873	0.00928136	0.0109138	0.00913391	0.00919385	0.0094021	0.00943551	Bat	Rhabdovirus	Bat	1
Border disease virus	0.98936	0.00108692	0.000986394	0.00076972	0.000852436	0.00110222	0.000681662	0.00349787	0.00166267	Artiodactyl	Flavivirus	Artiodactyl	1			Border disease virus	0.987066	0.0013278	0.0012107	0.000944312	0.00103449	0.00135202	0.000836104	0.00424378	0.00198454	Artiodactyl	Flavivirus	Artiodactyl	1
Bovine astrovirus B170/HK	0.961486	0.00477562	0.004373	0.00486629	0.00542429	0.00418066	0.00416699	0.00585595	0.00487089	Artiodactyl	Astrovirus	Artiodactyl	1			Bovine astrovirus B170/HK	0.952856	0.00585051	0.00535505	0.00595613	0.00660744	0.00512607	0.00511147	0.00716766	0.00596976	Artiodactyl	Astrovirus	Artiodactyl	1
Bovine astrovirus B18/HK	0.947427	0.00627584	0.0062001	0.00649215	0.00733991	0.00598922	0.00591006	0.00767842	0.00668736	Artiodactyl	Astrovirus	Artiodactyl	1			Bovine astrovirus B18/HK	0.951773	0.00575579	0.00568774	0.00595558	0.00673108	0.00549198	0.00541851	0.00705354	0.006133	Artiodactyl	Astrovirus	Artiodactyl	1
Bovine astrovirus B76/HK	0.99787	0.000134955	0.000129958	0.000554847	0.000234343	7.89309e-05	6.34233e-05	0.000813137	0.000120261	Artiodactyl	Astrovirus	Artiodactyl	1			Bovine astrovirus B76/HK	0.998895	5.79671e-05	6.75828e-05	0.000600507	1.61121e-05	1.30229e-05	1.13902e-05	0.000273055	6.56531e-05	Artiodactyl	Astrovirus	Artiodactyl	1
Bovine astrovirus CH13	0.638157	0.0152919	0.0106958	0.183807	0.0082283	0.00873932	0.00821137	0.0430716	0.0837986	Artiodactyl	Astrovirus	Artiodactyl	1			Bovine astrovirus CH13	0.630626	0.0116851	0.00820362	0.23433	0.00608353	0.00646355	0.00607051	0.0338109	0.0627273	Artiodactyl	Astrovirus	Artiodactyl	1
Bovine enteritic coronavirus	0.93402	0.00641961	0.0073641	0.0063173	0.00528582	0.00533131	0.00525839	0.0231195	0.00688412	Artiodactyl	Coronavirus	Artiodactyl	1			Bovine enteritic coronavirus	0.950515	0.00404425	0.00465125	0.00386096	0.00289845	0.00294358	0.00288368	0.0239886	0.00421393	Artiodactyl	Coronavirus	Artiodactyl	1
Bovine ephemeral fever virus	0.973614	0.00619904	0.00232146	0.0031197	0.00245786	0.00261184	0.00191327	0.00394794	0.00381519	Artiodactyl	Rhabdovirus	Artiodactyl	1			Bovine ephemeral fever virus	0.973614	0.00619904	0.00232146	0.0031197	0.00245786	0.00261184	0.00191327	0.00394794	0.00381519	Artiodactyl	Rhabdovirus	Artiodactyl	1
Bovine hepacivirus	0.0661662	0.0585879	0.0194383	0.0253232	0.00578147	0.0107396	0.00516645	0.278105	0.530692	Rodent	Flavivirus	Artiodactyl	0			Bovine hepacivirus	0.0831452	0.104513	0.0266424	0.0408329	0.00747177	0.0122781	0.0069305	0.252827	0.465359	Rodent	Flavivirus	Artiodactyl	0
Bovine parainfluenza virus 3	0.0140724	0.00653246	0.00541609	0.00752795	0.0060049	0.00703807	0.00632683	0.884139	0.0629418	Primate	Paramyxovirus	Artiodactyl	0			Bovine parainfluenza virus 3	0.0127293	0.00588028	0.0048746	0.0168175	0.00540586	0.00633545	0.0057212	0.873247	0.0689891	Primate	Paramyxovirus	Artiodactyl	0
Bovine respiratory coronavirus AH187	0.968277	0.000987054	0.0016027	0.000768449	0.000425161	0.000471892	0.000438477	0.0250453	0.00198428	Artiodactyl	Coronavirus	Artiodactyl	1			Bovine respiratory coronavirus AH187	0.987486	0.00114137	0.00185985	0.000891871	0.000499045	0.000553921	0.000514687	0.00473361	0.00231949	Artiodactyl	Coronavirus	Artiodactyl	1
Bovine respiratory syncytial virus	0.0275014	0.00732388	0.00838264	0.280068	0.00632918	0.00608297	0.00597337	0.613795	0.0445432	Primate	Paramyxovirus	Artiodactyl	0			Bovine respiratory syncytial virus	0.0275014	0.00732388	0.00838264	0.280068	0.00632918	0.00608297	0.00597337	0.613795	0.0445432	Primate	Paramyxovirus	Artiodactyl	0
Bovine viral diarrhea virus 1	0.949917	0.00499509	0.00485288	0.00502844	0.00491187	0.00542704	0.00438619	0.0120848	0.0083967	Artiodactyl	Flavivirus	Artiodactyl	1			Bovine viral diarrhea virus 1	0.947001	0.0055918	0.00527439	0.00561008	0.00543606	0.00598692	0.00490178	0.0118378	0.00836021	Artiodactyl	Flavivirus	Artiodactyl	1
Bovine viral diarrhea virus 2	0.991212	0.000680798	0.000382437	0.000599796	0.000468042	0.00059273	0.00041462	0.00236674	0.00328279	Artiodactyl	Flavivirus	Artiodactyl	1			Bovine viral diarrhea virus 2	0.990814	0.000711743	0.00039982	0.00062706	0.000489316	0.000619673	0.000433467	0.00247421	0.00343097	Artiodactyl	Flavivirus	Artiodactyl	1
Bovine viral diarrhea virus 3	0.980834	0.000866504	0.000981014	0.00079323	0.00107474	0.00106604	0.000642326	0.00863972	0.0051022	Artiodactyl	Flavivirus	Artiodactyl	1			Bovine viral diarrhea virus 3	0.988968	0.000173624	0.000181032	0.00025113	0.000471366	0.000289746	0.000136323	0.00611547	0.00341348	Artiodactyl	Flavivirus	Artiodactyl	1
Breda virus	0.928208	0.0124595	0.00814686	0.00782783	0.00617766	0.00635284	0.00616017	0.0153502	0.00931676	Artiodactyl	Coronavirus	Artiodactyl	1			Breda virus	0.921333	0.0135516	0.00894707	0.00859964	0.00679536	0.00698782	0.00677612	0.0168627	0.010147	Artiodactyl	Coronavirus	Artiodactyl	1
Buggy Creek virus	0.00760367	0.00685747	0.94067	0.00741067	0.00747856	0.00690431	0.00664957	0.0081267	0.00829863	Bird	Togavirus	Bird	1			Buggy Creek virus	0.00684468	0.00617178	0.946587	0.00666988	0.00673071	0.00621388	0.00598462	0.00731808	0.00747915	Bird	Togavirus	Bird	1
Burkina Faso astrovirus	0.141657	0.00427347	0.00530061	0.0170068	0.00302179	0.00351751	0.0033432	0.815475	0.00640479	Primate	Astrovirus	Primate	1			Burkina Faso astrovirus	0.130417	0.00468045	0.00580542	0.0186101	0.00330958	0.00385251	0.0036616	0.82265	0.00701414	Primate	Astrovirus	Primate	1
Calicivirus isolate TCG	0.918368	0.00840782	0.00791314	0.0153257	0.0103035	0.00767572	0.00750289	0.0162404	0.00826308	Artiodactyl	Calicivirus	Artiodactyl	1			Calicivirus isolate TCG	0.917765	0.00842515	0.0082566	0.0144977	0.011316	0.00816328	0.00798661	0.0150811	0.00850864	Artiodactyl	Calicivirus	Artiodactyl	1
Calicivirus pig AB90	0.917717	0.00969489	0.0092867	0.0104367	0.00765351	0.0074631	0.00743749	0.0135292	0.016781	Artiodactyl	Calicivirus	Artiodactyl	1			Calicivirus pig AB90	0.894235	0.0125668	0.0129602	0.01329	0.0108066	0.0106529	0.0106322	0.0160954	0.0187613	Artiodactyl	Calicivirus	Artiodactyl	1
California sea lion astrovirus 2	0.00842474	0.00205069	0.00053013	0.499231	5.89282e-05	9.47777e-05	2.29663e-06	0.489025	0.000582336	Carnivore	Astrovirus	Carnivore	1			California sea lion astrovirus 2	0.00971737	0.00453141	0.00486057	0.555474	0.000966849	0.000982664	0.00072263	0.420579	0.00216532	Carnivore	Astrovirus	Carnivore	1
Camel alphacoronavirus	0.707603	0.0843109	0.00406385	0.00460591	0.00271316	0.00267933	0.00262002	0.188103	0.00330079	Artiodactyl	Coronavirus	Artiodactyl	1			Camel alphacoronavirus	0.705939	0.0859211	0.00523302	0.00570022	0.00353599	0.0035223	0.00344979	0.182309	0.00438974	Artiodactyl	Coronavirus	Artiodactyl	1
Canine astrovirus	0.0251022	0.00285332	0.0276787	0.282716	0.000344088	0.000459849	0.000312597	0.513528	0.147005	Primate	Astrovirus	Carnivore	0			Canine astrovirus	0.106825	0.00839302	0.0334508	0.25078	0.00494121	0.00539598	0.00488225	0.417608	0.167723	Primate	Astrovirus	Carnivore	0
Canine calicivirus	0.0547917	0.0112854	0.00975033	0.871825	0.00994878	0.00979624	0.00951784	0.0134565	0.00962784	Carnivore	Calicivirus	Carnivore	1			Canine calicivirus	0.0576359	0.0118783	0.0102634	0.865173	0.0104723	0.0103117	0.0100188	0.0141125	0.0101343	Carnivore	Calicivirus	Carnivore	1
Canine coronavirus	0.0658067	0.317362	0.038419	0.500214	0.0132215	0.0137469	0.0114773	0.027291	0.0124611	Carnivore	Coronavirus	Carnivore	1			Canine coronavirus	0.0694314	0.334649	0.0405348	0.472848	0.013956	0.0145106	0.0121149	0.0288037	0.013152	Carnivore	Coronavirus	Carnivore	1
Canine distemper virus	0.0368202	0.0335575	0.0163114	0.626758	0.0139581	0.0160439	0.0133861	0.0369196	0.206245	Carnivore	Paramyxovirus	Carnivore	1			Canine distemper virus	0.0419691	0.0378059	0.0157917	0.619129	0.0127849	0.0154495	0.0120558	0.0420968	0.202917	Carnivore	Paramyxovirus	Carnivore	1
Canine kobuvirus 1	0.0108731	0.00572475	0.0462271	0.836266	0.00920232	0.00568392	0.0046249	0.0745545	0.00684377	Carnivore	Picornavirus	Carnivore	1			Canine kobuvirus 1	0.0118615	0.00624518	0.0504295	0.821381	0.0100389	0.00620064	0.00504534	0.0813318	0.00746593	Carnivore	Picornavirus	Carnivore	1
Canine pneumovirus	0.0249026	0.0196267	0.122888	0.0170743	0.0163494	0.0171599	0.0171445	0.0197273	0.745127	Rodent	Paramyxovirus	Carnivore	0			Canine pneumovirus	0.0298864	0.0279124	0.0999294	0.0244122	0.0237396	0.0245311	0.0244982	0.0286191	0.716472	Rodent	Paramyxovirus	Carnivore	0
Capsicum chlorosis virus	0.00226943	0.00156166	0.00151139	0.00157594	0.00150723	0.00201807	0.98485	0.00198213	0.00272387	Plant	Bunyavirus	Plant	1			Capsicum chlorosis virus	0.0023829	0.00163975	0.00158696	0.00165474	0.00158259	0.00211897	0.984093	0.00208123	0.00286007	Plant	Bunyavirus	Plant	1
Cardamones virus	3.07936e-07	4.19443e-07	2.05885e-07	8.38564e-07	8.8785e-08	2.86928e-08	4.78501e-08	7.00147e-07	0.999997	Rodent	Arenavirus	Rodent	1			Cardamones virus	0.000461071	0.000809619	0.000440099	0.000467668	0.000357729	0.000355692	0.000480268	0.000445584	0.996182	Rodent	Arenavirus	Rodent	1
Catarina virus	0.0118087	0.0121007	0.0116616	0.0114878	0.0112433	0.0112782	0.0111504	0.0129209	0.906348	Rodent	Arenavirus	Rodent	1			Catarina virus	0.0133489	0.0136791	0.0131827	0.012986	0.0127098	0.0127493	0.0126048	0.014606	0.894134	Rodent	Arenavirus	Rodent	1
Cedar virus	0.0530403	0.492701	0.0105086	0.0111833	0.0104476	0.0104451	0.0105567	0.0106137	0.390504	Bat	Paramyxovirus	Bat	1			Cedar virus	0.0502487	0.519386	0.00995551	0.0105947	0.00989775	0.00989536	0.0100011	0.0100551	0.369966	Bat	Paramyxovirus	Bat	1
Cell fusing agent virus	0.00725744	0.00627511	0.00641926	0.00707072	0.00602126	0.949155	0.00546849	0.00619613	0.00613639	Insect	Flavivirus	Insect	1			Cell fusing agent virus	0.00973867	0.00840135	0.00849026	0.00926506	0.00803331	0.932406	0.00734242	0.00810083	0.00822167	Insect	Flavivirus	Insect	1
Chaoyang virus	0.0120867	0.00361484	0.115472	0.0027588	0.00482229	0.843885	0.00234317	0.0101901	0.00482759	Insect	Flavivirus	Insect	1			Chaoyang virus	0.0200728	0.00489108	0.142755	0.00379921	0.00706788	0.787825	0.00266249	0.0217041	0.0092225	Insect	Flavivirus	Insect	1
Chapare virus	0.00360396	0.00429746	0.00358689	0.00359502	0.00356215	0.00383798	0.00363414	0.00364763	0.970235	Rodent	Arenavirus	Rodent	1			Chapare virus	0.00456298	0.0053241	0.00456054	0.00456663	0.00454347	0.0047842	0.00463935	0.00460319	0.962416	Rodent	Arenavirus	Rodent	1
Chicken astrovirus	0.202179	0.0118944	0.696363	0.037713	0.00947668	0.00913002	0.00906488	0.0143967	0.00978252	Bird	Astrovirus	Bird	1			Chicken astrovirus	0.204509	0.012411	0.701811	0.0272499	0.0098887	0.00952698	0.009459	0.0149364	0.0102078	Bird	Astrovirus	Bird	1
Chicken calicivirus	0.0808145	0.00028676	0.773425	0.0199597	0.000430734	6.60042e-05	1.69972e-05	0.12401	0.000990036	Bird	Calicivirus	Bird	1			Chicken calicivirus	0.0992697	0.00657852	0.693077	0.0249155	0.00624734	0.00590818	0.00575735	0.15114	0.00710632	Bird	Calicivirus	Bird	1
Chicken gallivirus 1	0.00527805	0.00736355	0.935721	0.0280611	0.00420484	0.00348664	0.00328621	0.00846155	0.00413678	Bird	Picornavirus	Bird	1			Chicken gallivirus 1	0.00584355	0.0081525	0.928834	0.0310677	0.00465535	0.00386021	0.0036383	0.00936814	0.00458001	Bird	Picornavirus	Bird	1
Chicken megrivirus	0.0011475	0.000929219	0.994703	0.000803656	0.000599311	0.000283502	0.000318365	0.000686092	0.000529695	Bird	Picornavirus	Bird	1			Chicken megrivirus	0.00199686	0.00167833	0.989026	0.0020084	0.00123231	0.000742288	0.000689397	0.00153531	0.00109103	Bird	Picornavirus	Bird	1
Chicken orivirus 1	0.00823076	0.0136837	0.938044	0.00735794	0.00638	0.0058286	0.0055936	0.00827968	0.00660207	Bird	Picornavirus	Bird	1			Chicken orivirus 1	0.00791419	0.0131575	0.940427	0.00707494	0.00613462	0.00560443	0.00537846	0.00796123	0.00634815	Bird	Picornavirus	Bird	1
Chicken picornavirus 1	0.0113481	0.0105826	0.902036	0.0208947	0.00967022	0.00967975	0.00955015	0.0159538	0.0102844	Bird	Picornavirus	Bird	1			Chicken picornavirus 1	0.0113481	0.0105826	0.902036	0.0208947	0.00967022	0.00967975	0.00955015	0.0159538	0.0102844	Bird	Picornavirus	Bird	1
Chicken picornavirus 2	0.00447606	0.00276069	0.974705	0.00340011	0.00217919	0.00228384	0.00218058	0.00465498	0.00335955	Bird	Picornavirus	Bird	1			Chicken picornavirus 2	0.00565355	0.00348717	0.96805	0.00429485	0.00275266	0.00288485	0.00275442	0.00587943	0.00424325	Bird	Picornavirus	Bird	1
Chicken picornavirus 3	0.00123111	0.00140049	0.989569	0.00147558	0.00107218	0.00111417	0.000987263	0.00183422	0.00131636	Bird	Picornavirus	Bird	1			Chicken picornavirus 3	0.00155508	0.00176901	0.986824	0.00186389	0.00135433	0.00140737	0.00124707	0.00231689	0.00166278	Bird	Picornavirus	Bird	1
Chicken picornavirus 4	0.00462973	0.00452613	0.964515	0.00519109	0.00437315	0.00400865	0.00394274	0.00439539	0.00441817	Bird	Picornavirus	Bird	1			Chicken picornavirus 4	0.00505062	0.0049376	0.961289	0.00566301	0.00477071	0.00437307	0.00430117	0.00479497	0.00481982	Bird	Picornavirus	Bird	1
Chicken picornavirus 5	0.016596	0.0165845	0.870387	0.0215225	0.0152971	0.0143476	0.0140921	0.0158868	0.0152861	Bird	Picornavirus	Bird	1			Chicken picornavirus 5	0.0202067	0.0195947	0.846835	0.0236404	0.0180688	0.017102	0.0168047	0.0191325	0.0186154	Bird	Picornavirus	Bird	1
Chicken proventriculitis virus	0.00571204	0.00584274	0.957168	0.00719245	0.00485071	0.00470901	0.00458439	0.00509252	0.00484779	Bird	Picornavirus	Bird	1			Chicken proventriculitis virus	0.00645708	0.00660484	0.951582	0.0081306	0.00548342	0.00532323	0.00518236	0.00575677	0.00548011	Bird	Picornavirus	Bird	1
Chicken sicinivirus JSY	0.00300388	0.00127794	0.98401	0.00559915	0.000734141	0.000753074	0.000732333	0.00262344	0.0012657	Bird	Picornavirus	Bird	1			Chicken sicinivirus JSY	0.00330425	0.00140573	0.982412	0.00615905	0.000807555	0.000828381	0.000805566	0.00288535	0.00139227	Bird	Picornavirus	Bird	1
Chikungunya virus	0.188275	3.91594e-05	0.622202	0.000924277	0.000215304	0.000156716	1.98651e-06	0.179446	0.00873874	Bird	Togavirus	Primate	0			Chikungunya virus	0.20502	0.00463977	0.597784	0.00540835	0.00505286	0.00472353	0.00457179	0.160444	0.0123562	Bird	Togavirus	Primate	0
Classical swine fever virus	0.996855	0.000305331	0.000144753	0.000229701	0.000198723	0.000140803	0.000101076	0.00095049	0.00107401	Artiodactyl	Flavivirus	Artiodactyl	1			Classical swine fever virus	0.997259	0.000265013	0.000125529	0.000198538	0.000172621	0.000122138	8.73865e-05	0.00082592	0.000943955	Artiodactyl	Flavivirus	Artiodactyl	1
Coastal Plains virus	0.534245	0.147024	0.00682438	0.0385888	0.00376652	0.0196745	0.00368826	0.0677788	0.17841	Artiodactyl	Rhabdovirus	Artiodactyl	1			Coastal Plains virus	0.538326	0.155873	0.00786536	0.0369739	0.00357636	0.0181703	0.00347573	0.070562	0.165178	Artiodactyl	Rhabdovirus	Artiodactyl	1
Common-moorhen coronavirus HKU21	0.00936394	0.00819206	0.924067	0.00751612	0.00673303	0.00698333	0.00672694	0.0230167	0.0074006	Bird	Coronavirus	Bird	1			Common-moorhen coronavirus HKU21	0.00672169	0.00591313	0.942561	0.00539856	0.00483764	0.00500454	0.00481136	0.0194211	0.00533077	Bird	Coronavirus	Bird	1
Culex flavivirus	0.00409083	0.00350896	0.00341205	0.00454447	0.00349754	0.969025	0.00315362	0.00360245	0.00516476	Insect	Flavivirus	Insect	1			Culex flavivirus	0.0044055	0.00377888	0.00367452	0.00489404	0.00376657	0.966643	0.0033962	0.00387956	0.00556198	Insect	Flavivirus	Insect	1
Culex tritaeniorhynchus rhabdovirus	0.0106571	0.0112455	0.00777886	0.0379629	0.520835	0.372497	0.00465296	0.0221066	0.0122639	Fish	Rhabdovirus	Insect	0			Culex tritaeniorhynchus rhabdovirus	0.0116842	0.0123374	0.00851359	0.0400274	0.488641	0.396224	0.00511705	0.0241456	0.0133095	Fish	Rhabdovirus	Insect	0
Cupixi virus	0.00401531	0.00474053	0.00409559	0.00401899	0.00387005	0.00391167	0.00387774	0.00396964	0.9675	Rodent	Arenavirus	Rodent	1			Cupixi virus	0.00497133	0.00586905	0.00507073	0.00497589	0.00479149	0.00484302	0.00480101	0.00491479	0.959763	Rodent	Arenavirus	Rodent	1
Cutthroat trout virus	0.0300526	0.0973528	0.278106	0.0912829	0.0198682	0.0203065	0.0196953	0.420959	0.0223771	Primate	Hepevirus	Fish	0			Cutthroat trout virus	0.0286815	0.0783483	0.236871	0.126732	0.0163335	0.0162343	0.0155975	0.460163	0.02104	Primate	Hepevirus	Fish	0
Dandenong virus	9.75099e-05	0.000743486	8.61068e-05	0.000109931	7.80758e-05	7.93268e-05	7.79818e-05	0.000118964	0.998609	Rodent	Arenavirus	Rodent	1			Dandenong virus	8.72499e-05	0.00082203	8.20058e-05	0.000100877	8.08233e-05	8.09821e-05	8.09501e-05	0.000109741	0.998555	Rodent	Arenavirus	Rodent	1
Dengue virus 1	0.0147512	0.0133227	0.0183362	0.0134122	0.0120112	0.0129681	0.0113421	0.886129	0.0177267	Primate	Flavivirus	Primate	1			Dengue virus 1	0.0147512	0.0133227	0.0183362	0.0134122	0.0120112	0.0129681	0.0113421	0.886129	0.0177267	Primate	Flavivirus	Primate	1
Dengue virus 2	0.0175295	0.00969455	0.0237394	0.0110465	0.0182349	0.0122455	0.00843464	0.883795	0.0152802	Primate	Flavivirus	Primate	1			Dengue virus 2	0.020418	0.0113055	0.0276818	0.0128874	0.0212706	0.014264	0.00984031	0.864508	0.0178249	Primate	Flavivirus	Primate	1
Dengue virus 3	0.0388201	0.0167591	0.0266048	0.0169144	0.0154537	0.0148061	0.014291	0.836992	0.0193589	Primate	Flavivirus	Primate	1			Dengue virus 3	0.0352015	0.0131007	0.0213552	0.0137131	0.0124971	0.0116597	0.0114821	0.865011	0.0159799	Primate	Flavivirus	Primate	1
Dengue virus 4	0.0159477	0.0111885	0.0191428	0.0124208	0.00992432	0.0109753	0.00985967	0.889426	0.0211153	Primate	Flavivirus	Primate	1			Dengue virus 4	0.0159477	0.0111885	0.0191428	0.0124208	0.00992432	0.0109753	0.00985967	0.889426	0.0211153	Primate	Flavivirus	Primate	1
Dobrava-Belgrade virus	0.0081478	0.00795718	0.00834085	0.00818707	0.00785935	0.00786341	0.0078812	0.00913746	0.934626	Rodent	Bunyavirus	Rodent	1			Dobrava-Belgrade virus	0.00795022	0.00797998	0.00805478	0.00817955	0.00763897	0.0076518	0.00765679	0.00911954	0.935768	Rodent	Bunyavirus	Rodent	1
Donggang virus	0.0888614	0.0258992	0.22897	0.0123475	0.0118041	0.584379	0.0121248	0.0223058	0.0133079	Insect	Flavivirus	Insect	1			Donggang virus	0.0760447	0.0251837	0.314705	0.0124582	0.0118298	0.512509	0.0121407	0.021292	0.0138377	Insect	Flavivirus	Insect	1
Dromedary astrovirus	0.91208	0.00898914	0.00951024	0.0190609	0.00871865	0.00874779	0.00871857	0.015223	0.0089515	Artiodactyl	Astrovirus	Artiodactyl	1			Dromedary astrovirus	0.899017	0.0103375	0.0109368	0.0218145	0.0100264	0.01006	0.0100263	0.0174874	0.0102942	Artiodactyl	Astrovirus	Artiodactyl	1
Dromedary camel coronavirus HKU23	0.91078	0.0105973	0.0104131	0.0104381	0.0102026	0.0102015	0.0102006	0.015575	0.0115922	Artiodactyl	Coronavirus	Artiodactyl	1			Dromedary camel coronavirus HKU23	0.902433	0.011888	0.0109051	0.0111127	0.0101336	0.0101334	0.0101354	0.0196074	0.0136516	Artiodactyl	Coronavirus	Artiodactyl	1
Dromedary camel enterovirus	0.169572	0.337968	0.0437377	0.0902138	0.00962928	0.0104485	0.00957344	0.194699	0.134158	Bat	Picornavirus	Artiodactyl	0			Dromedary camel enterovirus	0.1709	0.271694	0.0452254	0.0930133	0.0095181	0.00988091	0.00946113	0.298587	0.0917202	Primate	Picornavirus	Artiodactyl	0
Drosophila melanogaster sigmavirus	0.0629077	0.108059	0.0249678	0.0687516	0.173905	0.381269	0.0702887	0.063118	0.0467334	Insect	Rhabdovirus	Insect	1			Drosophila melanogaster sigmavirus	0.0540207	0.0880117	0.0207324	0.0763582	0.203676	0.406048	0.0573711	0.0541101	0.0396712	Insect	Rhabdovirus	Insect	1
Drosophila obscura sigmavirus	0.378494	0.190899	0.0144136	0.197404	0.03706	0.0330611	0.00847993	0.112801	0.0273874	Artiodactyl	Rhabdovirus	Insect	0			Drosophila obscura sigmavirus	0.371323	0.19012	0.0156056	0.193343	0.0360994	0.0336734	0.00950005	0.122858	0.0274777	Artiodactyl	Rhabdovirus	Insect	0
Duck hepatitis A virus	0.00677718	0.0105093	0.921489	0.0275496	0.00698664	0.00604222	0.00595894	0.00787862	0.00680892	Bird	Picornavirus	Bird	1			Duck hepatitis A virus	0.00677718	0.0105093	0.921489	0.0275496	0.00698664	0.00604222	0.00595894	0.00787862	0.00680892	Bird	Picornavirus	Bird	1
Duck megrivirus	0.00903329	0.338513	0.528902	0.0848596	0.00633635	0.00599909	0.00590545	0.0132384	0.00721238	Bird	Picornavirus	Bird	1			Duck megrivirus	0.00841237	0.34472	0.528518	0.0809998	0.00568959	0.00533834	0.00518318	0.0146132	0.00652549	Bird	Picornavirus	Bird	1
Duck picornavirus GL/12	0.000396788	0.00315876	0.862542	0.125686	0.00051844	0.000194667	3.37077e-05	0.00462523	0.00284438	Bird	Picornavirus	Bird	1			Duck picornavirus GL/12	0.000374744	0.00298328	0.870178	0.118704	0.000489638	0.000183853	3.1835e-05	0.00436829	0.00268637	Bird	Picornavirus	Bird	1
Dugbe virus	0.264984	0.363271	0.036781	0.0126269	0.0134427	0.139749	0.0115563	0.135872	0.0217175	Bat	Bunyavirus	Artiodactyl	0			Dugbe virus	0.231609	0.313168	0.0933219	0.0183777	0.0219329	0.100078	0.0171402	0.129677	0.074695	Bat	Bunyavirus	Artiodactyl	0
Duvenhage virus	0.00241179	0.979152	0.00208614	0.00317848	0.00372682	0.00268038	0.00227335	0.00206655	0.00242472	Bat	Rhabdovirus	Bat	1			Duvenhage virus	0.00221472	0.981882	0.00183289	0.00274348	0.00294241	0.00231215	0.0021505	0.00182874	0.00209302	Bat	Rhabdovirus	Bat	1
Eastern equine encephalitis virus	0.00379606	0.00328904	0.969603	0.00377662	0.00337026	0.00346668	0.00294989	0.0042573	0.00549163	Bird	Togavirus	Bird	1			Eastern equine encephalitis virus	0.00324886	0.00283869	0.966819	0.00593581	0.00289064	0.00297384	0.00251015	0.0041056	0.00867717	Bird	Togavirus	Bird	1
Eel virus European X	0.000176301	0.00149868	1.02952e-05	3.13962e-05	0.996717	3.76259e-05	5.51957e-06	2.18644e-05	0.0015012	Fish	Rhabdovirus	Fish	1			Eel virus European X	0.000237373	0.0018819	1.2197e-05	4.22747e-05	0.995748	4.61343e-05	7.41096e-06	2.84747e-05	0.00199645	Fish	Rhabdovirus	Fish	1
Eggplant mottled dwarf virus	0.0106898	0.0115076	0.00989799	0.0103288	0.00996248	0.0106598	0.91623	0.00978082	0.0109427	Plant	Rhabdovirus	Plant	1			Eggplant mottled dwarf virus	0.00712324	0.008174	0.0059136	0.00698562	0.00647311	0.00715944	0.944547	0.0063151	0.00730906	Plant	Rhabdovirus	Plant	1
Eilat virus	0.103517	0.0118234	0.739633	0.027277	0.0414932	0.0122208	0.00957987	0.0369345	0.0175209	Bird	Togavirus	Insect	0			Eilat virus	0.10376	0.0148087	0.702147	0.0379674	0.042671	0.0161789	0.0132499	0.0439221	0.0252951	Bird	Togavirus	Insect	0
Entebbe bat virus	0.0082531	0.882791	0.00509709	0.00321905	0.00318302	0.00304569	0.00176843	0.0330983	0.0595439	Bat	Flavivirus	Bat	1			Entebbe bat virus	0.0131839	0.826514	0.022755	0.00543309	0.00525108	0.00520387	0.00368773	0.0508176	0.0671533	Bat	Flavivirus	Bat	1
Enterovirus A71	0.0192411	0.168425	0.0115657	0.0204187	0.00785272	0.00788293	0.00769159	0.717526	0.0393964	Primate	Picornavirus	Primate	1			Enterovirus A71	0.0183877	0.157405	0.0104228	0.0355217	0.00698046	0.00700618	0.00684639	0.723111	0.0343185	Primate	Picornavirus	Primate	1
European bat lyssavirus 1	0.0108288	0.911422	0.0106209	0.0119041	0.0117969	0.0110002	0.010436	0.0107636	0.0112274	Bat	Rhabdovirus	Bat	1			European bat lyssavirus 1	0.0129051	0.89552	0.0126775	0.014117	0.013554	0.0127459	0.0125643	0.0127038	0.013212	Bat	Rhabdovirus	Bat	1
European bat lyssavirus 2	0.0121456	0.897416	0.012468	0.0141732	0.01396	0.0127543	0.0121338	0.0122736	0.012675	Bat	Rhabdovirus	Bat	1			European bat lyssavirus 2	0.0130309	0.891674	0.0133531	0.015099	0.0142038	0.0131741	0.0130111	0.0131117	0.013342	Bat	Rhabdovirus	Bat	1
Falcovirus A1	0.363814	0.0502411	0.37412	0.0475388	0.0118915	0.0207641	0.0085668	0.111409	0.011654	Bird	Picornavirus	Bird	1			Falcovirus A1	0.354271	0.0478728	0.373426	0.0460243	0.0113299	0.0197757	0.00815886	0.128042	0.0110995	Bird	Picornavirus	Bird	1
Farmington virus	0.0183488	0.0248566	0.0140618	0.0694665	0.0381438	0.119641	0.682533	0.0179727	0.0149757	Plant	Rhabdovirus	Bird	0			Farmington virus	0.0179408	0.0491023	0.0146379	0.0600757	0.0326094	0.0999712	0.677935	0.0304473	0.0172804	Plant	Rhabdovirus	Bird	0
Fathead minnow picornavirus	0.0731275	0.0978335	0.755403	0.00777482	0.0113491	0.0288044	0.00611669	0.0104388	0.00915257	Bird	Picornavirus	Fish	0			Fathead minnow picornavirus	0.0733994	0.139918	0.664056	0.012553	0.0150987	0.0588348	0.00684166	0.0183973	0.0109017	Bird	Picornavirus	Fish	0
Feline astrovirus 2	0.10565	0.0152173	0.0167405	0.74593	0.0145368	0.0146801	0.0140877	0.0555204	0.017638	Carnivore	Astrovirus	Carnivore	1			Feline astrovirus 2	0.106248	0.0171754	0.0185992	0.728196	0.0167171	0.0168793	0.0162338	0.0599827	0.0199691	Carnivore	Astrovirus	Carnivore	1
Feline astrovirus D1	0.83848	0.0134069	0.00465831	0.0346177	0.00335981	0.00380277	0.00351243	0.0871214	0.0110402	Artiodactyl	Astrovirus	Carnivore	0			Feline astrovirus D1	0.795952	0.0143614	0.00679377	0.0393361	0.00468647	0.00529136	0.0048231	0.115693	0.013063	Artiodactyl	Astrovirus	Carnivore	0
Feline calicivirus	0.0210173	0.0113133	0.00972196	0.666502	0.00783833	0.00819765	0.00766264	0.0290567	0.23869	Carnivore	Calicivirus	Carnivore	1			Feline calicivirus	0.0213222	0.0111115	0.0100335	0.635196	0.007945	0.00835646	0.00783531	0.0313811	0.266818	Carnivore	Calicivirus	Carnivore	1
Feline coronavirus	0.237163	0.174	0.00359328	0.568899	0.00283295	0.00211243	0.0020299	0.0057359	0.00363351	Carnivore	Coronavirus	Carnivore	1			Feline coronavirus	0.204547	0.180624	0.00499081	0.586506	0.00527084	0.00289365	0.00278937	0.00778659	0.004592	Carnivore	Coronavirus	Carnivore	1
Feline kobuvirus	0.015965	0.00357672	0.128444	0.75263	0.0071724	0.00164008	0.00123411	0.0870904	0.00224758	Carnivore	Picornavirus	Carnivore	1			Feline kobuvirus	0.017551	0.00393239	0.094763	0.777663	0.00788925	0.001804	0.00135751	0.0925677	0.00247219	Carnivore	Picornavirus	Carnivore	1
Feline morbillivirus	0.505762	0.00891464	0.00388215	0.0249987	0.00334182	0.00388905	0.00488812	0.395699	0.0486247	Artiodactyl	Paramyxovirus	Carnivore	0			Feline morbillivirus	0.49867	0.0118523	0.00448395	0.0271156	0.00384747	0.00437096	0.00550672	0.394552	0.0496018	Artiodactyl	Paramyxovirus	Carnivore	0
Feline picornavirus	0.166252	0.755371	0.00822234	0.0135153	0.00660399	0.00730354	0.00630018	0.0197256	0.016706	Bat	Picornavirus	Carnivore	0			Feline picornavirus	0.212066	0.649634	0.0126703	0.0204895	0.0114776	0.0118001	0.011216	0.037931	0.0327152	Bat	Picornavirus	Carnivore	0
Feline sakobuvirus A	0.149334	0.0221712	0.171273	0.510718	0.0037622	0.00213457	0.00234181	0.133811	0.00445473	Carnivore	Picornavirus	Carnivore	1			Feline sakobuvirus A	0.140167	0.0349057	0.23674	0.39361	0.00802399	0.00701412	0.00713549	0.162735	0.00966882	Carnivore	Picornavirus	Carnivore	1
Ferak virus	0.0341609	0.0315606	0.0124698	0.0146551	0.0186514	0.543706	0.0406722	0.260188	0.0439364	Insect	Bunyavirus	Insect	1			Ferak virus	0.0341609	0.0315606	0.0124698	0.0146551	0.0186514	0.543706	0.0406722	0.260188	0.0439364	Insect	Bunyavirus	Insect	1
Ferret hepatitis E virus	0.0319364	0.00168742	0.00867121	0.00384219	0.000180939	0.000602909	8.44571e-05	0.316067	0.636927	Rodent	Hepevirus	Carnivore	0			Ferret hepatitis E virus	0.0336152	0.00177606	0.00912757	0.00404401	0.000190456	0.000634564	8.88985e-05	0.332615	0.617908	Rodent	Hepevirus	Carnivore	0
Ferret kobuvirus	0.0509622	0.00528569	0.107304	0.638084	0.00577853	0.00179615	0.00105747	0.00866026	0.181072	Carnivore	Picornavirus	Carnivore	1			Ferret kobuvirus	0.0463715	0.00574867	0.089587	0.648692	0.00676837	0.00308811	0.00225748	0.013642	0.183845	Carnivore	Picornavirus	Carnivore	1
Fikirini bat rhabdovirus	0.828594	0.00262203	0.00263845	0.00250735	0.150392	0.00482067	0.00247639	0.00284166	0.00310724	Artiodactyl	Rhabdovirus	Bat	0			Fikirini bat rhabdovirus	0.822513	0.00426519	0.0040266	0.00395296	0.144689	0.00757167	0.0038172	0.00421012	0.00495469	Artiodactyl	Rhabdovirus	Bat	0
Flexal virus	0.0075506	0.00891333	0.00751555	0.00755558	0.00743492	0.00746946	0.00742968	0.00758749	0.938543	Rodent	Arenavirus	Rodent	1			Flexal virus	0.00104375	0.00184449	0.000990284	0.00107078	0.000973375	0.000970066	0.000958283	0.00113351	0.991015	Rodent	Arenavirus	Rodent	1
Foot-and-mouth disease virus - type A	0.136798	0.56502	0.119232	0.0498151	0.0328128	0.0139001	0.00666088	0.0121634	0.0635978	Bat	Picornavirus	Artiodactyl	0			Foot-and-mouth disease virus - type A	0.136798	0.56502	0.119232	0.0498151	0.0328128	0.0139001	0.00666088	0.0121634	0.0635978	Bat	Picornavirus	Artiodactyl	0
Fort Morgan virus	0.00616936	0.00595458	0.949904	0.00607136	0.00594028	0.00600269	0.00594353	0.00713623	0.00687782	Bird	Togavirus	Bird	1			Fort Morgan virus	0.00616936	0.00595458	0.949904	0.00607136	0.00594028	0.00600269	0.00594353	0.00713623	0.00687782	Bird	Togavirus	Bird	1
Gairo virus	0.00627705	0.00688646	0.00559387	0.00536958	0.00518459	0.00518631	0.00523819	0.00550595	0.954758	Rodent	Arenavirus	Rodent	1			Gairo virus	0.00724109	0.00772606	0.0062623	0.0061708	0.00595562	0.00593527	0.00602609	0.00624291	0.94844	Rodent	Arenavirus	Rodent	1
Gallivirus Pf-CHK1/GV	0.00640603	0.0060187	0.903536	0.0604006	0.00436982	0.00369632	0.00343833	0.00783566	0.00429879	Bird	Picornavirus	Bird	1			Gallivirus Pf-CHK1/GV	0.00467624	0.00434292	0.901951	0.0756142	0.0022228	0.00131559	0.000965942	0.00689018	0.00202107	Bird	Picornavirus	Bird	1
GB virus C	0.0418105	0.00244496	0.00275239	0.0298495	0.00163245	0.00190216	0.0011808	0.437232	0.481196	Rodent	Flavivirus	Primate	0			GB virus C	0.0418105	0.00244496	0.00275239	0.0298495	0.00163245	0.00190216	0.0011808	0.437232	0.481196	Rodent	Flavivirus	Primate	0
Gbagroube virus	0.00689436	0.00605002	0.00595506	0.00356356	0.0024786	0.00429623	0.0026528	0.004084	0.964025	Rodent	Arenavirus	Rodent	1			Gbagroube virus	0.00689436	0.00605002	0.00595506	0.00356356	0.0024786	0.00429623	0.0026528	0.004084	0.964025	Rodent	Arenavirus	Rodent	1
Goose astrovirus	0.0291201	0.0192732	0.814081	0.0492423	0.0158494	0.0123453	0.0122709	0.0188802	0.0289378	Bird	Astrovirus	Bird	1			Goose astrovirus	0.0378635	0.0253889	0.783331	0.0497642	0.0181972	0.0150141	0.0149342	0.0226784	0.032828	Bird	Astrovirus	Bird	1
Goose calicivirus	0.0732125	0.0132566	0.754175	0.0832734	0.0116667	0.0113447	0.010837	0.0279053	0.0143288	Bird	Calicivirus	Bird	1			Goose calicivirus	0.0697751	0.0126347	0.765161	0.0796889	0.0111243	0.0108105	0.0103248	0.026782	0.013699	Bird	Calicivirus	Bird	1
Goose paramyxovirus SF02	0.000523579	0.000128731	0.997047	0.000153433	0.000141823	0.000197614	0.000117785	0.00113202	0.000558078	Bird	Paramyxovirus	Bird	1			Goose paramyxovirus SF02	0.00061312	0.000153719	0.996756	0.000179025	0.000169854	0.000223343	0.00013292	0.00110248	0.000669824	Bird	Paramyxovirus	Bird	1
Gouleako virus	0.377496	0.210816	0.010767	0.0214975	0.0139891	0.127396	0.0187186	0.0228195	0.196501	Artiodactyl	Bunyavirus	Insect	0			Gouleako virus	0.360759	0.202048	0.0101997	0.0241677	0.013241	0.154023	0.0178838	0.0218473	0.19583	Artiodactyl	Bunyavirus	Insect	0
Grass carp rhabdovirus V76	0.00801051	0.0101281	0.00782156	0.00849722	0.925368	0.0158975	0.00771376	0.00798597	0.00857745	Fish	Rhabdovirus	Fish	1			Grass carp rhabdovirus V76	0.00926054	0.0116767	0.00912152	0.00990703	0.913563	0.0181503	0.00897425	0.00931099	0.0100358	Fish	Rhabdovirus	Fish	1
Groundnut bud necrosis virus	0.00761353	0.00727185	0.0069463	0.007097	0.00702686	0.00786338	0.941159	0.00713754	0.00788434	Plant	Bunyavirus	Plant	1			Groundnut bud necrosis virus	0.00925413	0.00882049	0.0084519	0.0086235	0.00854798	0.00955409	0.928563	0.00868348	0.00950115	Plant	Bunyavirus	Plant	1
Guanarito virus	0.00564067	0.00823887	0.00545939	0.00552359	0.00566838	0.0054371	0.00543801	0.00559566	0.952998	Rodent	Arenavirus	Rodent	1			Guanarito virus	0.00564067	0.00823887	0.00545939	0.00552359	0.00566838	0.0054371	0.00543801	0.00559566	0.952998	Rodent	Arenavirus	Rodent	1
Hantaan virus	0.00845869	0.010188	0.0082355	0.00832924	0.00826074	0.00831405	0.00813151	0.00975258	0.93033	Rodent	Bunyavirus	Rodent	1			Hantaan virus	0.00919423	0.0110739	0.00895163	0.00905353	0.00897907	0.00903701	0.0088386	0.0106006	0.924271	Rodent	Bunyavirus	Rodent	1
Hendra virus	0.0113903	0.784662	0.0118187	0.0117751	0.0101023	0.00995846	0.0099497	0.0116744	0.138669	Bat	Paramyxovirus	Bat	1			Hendra virus	0.00946378	0.847814	0.0103013	0.0101138	0.00822488	0.00811052	0.00811847	0.00973447	0.0881191	Bat	Paramyxovirus	Bat	1
Hepatitis C virus	0.0109846	0.00749863	0.00684367	0.0120713	0.00558115	0.00535089	0.00496884	0.691663	0.255038	Primate	Flavivirus	Primate	1			Hepatitis C virus	0.0122012	0.00833169	0.0075851	0.0130647	0.0062012	0.00594541	0.00552093	0.670698	0.270452	Primate	Flavivirus	Primate	1
Hepatitis E virus	0.882855	0.00666077	0.00591215	0.00678388	0.00583745	0.00593156	0.00579825	0.0719484	0.00827208	Artiodactyl	Hepevirus	Artiodactyl	1			Hepatitis E virus	0.856725	0.00552048	0.00503373	0.00607015	0.0047536	0.00494812	0.00471619	0.10318	0.00905273	Artiodactyl	Hepevirus	Artiodactyl	1
Hepatitis E virus rat	0.519796	0.0290386	0.0049368	0.116417	0.00302709	0.00460073	0.00335241	0.302392	0.0164398	Artiodactyl	Hepevirus	Rodent	0			Hepatitis E virus rat	0.551497	0.0265607	0.00479178	0.0952176	0.00211522	0.00337859	0.00248831	0.3023	0.0116511	Artiodactyl	Hepevirus	Rodent	0
Hepatitis E virus, GT1	0.625638	0.0118221	0.00887468	0.0108971	0.00954766	0.00874037	0.0089297	0.30307	0.0124801	Artiodactyl	Hepevirus	Primate	0			Hepatitis E virus, GT1	0.633524	0.0144014	0.0116907	0.0151553	0.0123951	0.0115848	0.0118243	0.271629	0.0177961	Artiodactyl	Hepevirus	Primate	0
Hepatitis E virus, GT2	0.579752	0.0331877	0.00633107	0.0956998	0.00559253	0.00630427	0.00533744	0.239075	0.0287198	Artiodactyl	Hepevirus	Primate	0			Hepatitis E virus, GT2	0.571888	0.0343919	0.00861335	0.0750647	0.00766864	0.00812792	0.00738965	0.254914	0.0319415	Artiodactyl	Hepevirus	Primate	0
Hepatitis E virus, GT3	0.217689	0.0179771	0.0085196	0.018682	0.00812473	0.00871664	0.00811915	0.641501	0.0706703	Primate	Hepevirus	Artiodactyl	0			Hepatitis E virus, GT3	0.189706	0.030441	0.0198176	0.02633	0.0139162	0.0149004	0.0168316	0.61003	0.0780268	Primate	Hepevirus	Artiodactyl	0
Hepatitis E virus, GT4	0.520232	0.0148963	0.00892821	0.0127705	0.00630414	0.00740068	0.00601497	0.406881	0.0165725	Artiodactyl	Hepevirus	Artiodactyl	1			Hepatitis E virus, GT4	0.521732	0.0153266	0.00929957	0.013301	0.00656664	0.00770887	0.00626549	0.402565	0.0172346	Artiodactyl	Hepevirus	Artiodactyl	1
Herbert virus	0.122385	0.00562713	0.00485898	0.0067437	0.00421966	0.778324	0.0140188	0.0122367	0.0515861	Insect	Bunyavirus	Insect	1			Herbert virus	0.100722	0.00641232	0.00555293	0.00766638	0.00482232	0.79392	0.0160202	0.0107834	0.0540999	Insect	Bunyavirus	Insect	1
Highlands J virus	0.0100697	0.00744739	0.93004	0.007899	0.00730291	0.0072564	0.00672357	0.0107952	0.0124656	Bird	Togavirus	Bird	1			Highlands J virus	0.00906436	0.00738162	0.934116	0.00738364	0.00730821	0.00705804	0.00664943	0.0100841	0.0109546	Bird	Togavirus	Bird	1
Hirame rhabdovirus	0.00240214	0.00303211	0.0545902	0.00167603	0.779073	0.154576	0.00115736	0.00145617	0.00203661	Fish	Rhabdovirus	Fish	1			Hirame rhabdovirus	0.00219333	0.00276855	0.0498432	0.00153031	0.757352	0.182066	0.00105674	0.00132957	0.00185966	Fish	Rhabdovirus	Fish	1
HMO Astrovirus A	0.00497148	0.00311683	0.0028912	0.00327243	0.00207586	0.00225509	0.00212675	0.975263	0.00402765	Primate	Astrovirus	Primate	1			HMO Astrovirus A	0.00535918	0.00358197	0.00329058	0.00368701	0.00238129	0.00256269	0.00243053	0.972229	0.00447738	Primate	Astrovirus	Primate	1
Human coronavirus 229E	0.979771	0.0145953	0.000502579	0.000735963	0.00025973	0.000511733	0.000273639	0.00264593	0.000703723	Artiodactyl	Coronavirus	Primate	0			Human coronavirus 229E	0.955445	0.032366	0.00234747	0.00272382	0.000815705	0.000968113	0.00083613	0.00313473	0.00136258	Artiodactyl	Coronavirus	Primate	0
Human coronavirus HKU1	0.00621476	0.00782314	0.00477023	0.00719627	0.00424112	0.00424853	0.00415716	0.237712	0.723637	Rodent	Coronavirus	Primate	0			Human coronavirus HKU1	0.0066417	0.00858727	0.00523817	0.00791222	0.00466522	0.00467335	0.00457287	0.211695	0.746014	Rodent	Coronavirus	Primate	0
Human coronavirus NL63	0.0337108	0.815677	0.0226502	0.0226428	0.0179916	0.0182361	0.0174106	0.0332709	0.0184105	Bat	Coronavirus	Primate	0			Human coronavirus NL63	0.031938	0.825331	0.0214581	0.0214521	0.0170447	0.0172763	0.0164943	0.0315642	0.0174415	Bat	Coronavirus	Primate	0
Human coronavirus OC43	0.992364	0.000856086	0.000571114	0.000617807	0.000298839	0.000287598	0.000274576	0.00292336	0.00180618	Artiodactyl	Coronavirus	Primate	0			Human coronavirus OC43	0.991601	0.000941694	0.000628225	0.000679588	0.000328723	0.000316358	0.000302034	0.0032157	0.00198679	Artiodactyl	Coronavirus	Primate	0
Human enterovirus 107	0.0647228	0.0167402	0.0255948	0.0479493	0.0133683	0.0138798	0.0130569	0.764677	0.0400111	Primate	Picornavirus	Primate	1			Human enterovirus 107	0.0652301	0.0166437	0.0274648	0.0535501	0.0133239	0.0129934	0.0128497	0.755781	0.0421634	Primate	Picornavirus	Primate	1
Human metapneumovirus	0.0678306	0.0182636	0.51933	0.0143921	0.0126712	0.0152618	0.0116324	0.14256	0.198058	Bird	Paramyxovirus	Primate	0			Human metapneumovirus	0.120014	0.0274737	0.420275	0.0150238	0.013807	0.0176756	0.0131694	0.163839	0.208723	Bird	Paramyxovirus	Primate	0
Human parainfluenza virus 1	0.165327	0.0020144	0.00167802	0.00310976	0.0109332	0.00105163	0.000990224	0.540532	0.274365	Primate	Paramyxovirus	Primate	1			Human parainfluenza virus 1	0.127257	0.00225072	0.0018752	0.00347228	0.0121935	0.0011752	0.0011067	0.544793	0.305877	Primate	Paramyxovirus	Primate	1
Human parainfluenza virus 2	0.114706	0.0817745	0.0138084	0.0160094	0.0128875	0.0139315	0.012428	0.720992	0.013462	Primate	Paramyxovirus	Primate	1			Human parainfluenza virus 2	0.129432	0.0322887	0.0141659	0.0169979	0.0131898	0.0144437	0.0126116	0.753056	0.013815	Primate	Paramyxovirus	Primate	1
Human parainfluenza virus 3	0.882751	0.0105583	0.00944982	0.0113952	0.0109117	0.00985454	0.00945471	0.0454843	0.0101406	Artiodactyl	Paramyxovirus	Primate	0			Human parainfluenza virus 3	0.861733	0.013628	0.0126011	0.0146278	0.0140352	0.0130583	0.0127444	0.0442017	0.0133704	Artiodactyl	Paramyxovirus	Primate	0
Human pegivirus 2	0.0904502	0.10251	0.0111761	0.0201839	0.0166789	0.0168553	0.00716901	0.307444	0.427532	Rodent	Flavivirus	Primate	0			Human pegivirus 2	0.103294	0.097017	0.00963513	0.0180045	0.015012	0.0168754	0.00628888	0.283131	0.450742	Rodent	Flavivirus	Primate	0
Human poliovirus 2	0.0145425	0.0170027	0.00939135	0.0132636	0.00932206	0.00985707	0.00921303	0.904155	0.0132532	Primate	Picornavirus	Primate	1			Human poliovirus 2	0.0142902	0.0175615	0.00813952	0.0129035	0.00807394	0.00863216	0.0079314	0.909125	0.0133425	Primate	Picornavirus	Primate	1
Human respiratory syncytial virus	0.619761	0.00539063	0.00379885	0.0243825	0.00352825	0.00503698	0.00310968	0.308511	0.026481	Artiodactyl	Paramyxovirus	Primate	0			Human respiratory syncytial virus	0.568066	0.0168145	0.0136781	0.0328791	0.0112504	0.0130655	0.010914	0.298561	0.0347721	Artiodactyl	Paramyxovirus	Primate	0
Human rhinovirus B52	0.25216	0.00356173	0.0029534	0.00363529	0.00214322	0.00224948	0.00197399	0.721981	0.00934181	Primate	Picornavirus	Primate	1			Human rhinovirus B52	0.266343	0.0151338	0.00592584	0.00727705	0.00430837	0.00467611	0.00414674	0.676091	0.0160985	Primate	Picornavirus	Primate	1
Human SARS coronavirus	0.00587998	0.971187	0.00298923	0.00351484	0.00409552	0.0025604	0.00253907	0.00428002	0.00295412	Bat	Coronavirus	Bat	1			Human SARS coronavirus	0.0061599	0.969815	0.00313152	0.0036822	0.0042905	0.00268233	0.00265998	0.00448361	0.00309477	Bat	Coronavirus	Bat	1
Hybrid snakehead virus	0.00358523	0.00308758	0.00177421	0.00122604	0.981325	0.00266109	0.00145087	0.00187319	0.00301722	Fish	Rhabdovirus	Fish	1			Hybrid snakehead virus	0.00510333	0.00440753	0.00291949	0.00233192	0.970559	0.00429477	0.00271321	0.00305872	0.00461227	Fish	Rhabdovirus	Fish	1
Ia io picornavirus 1	0.0403402	0.592872	0.233869	0.075099	0.00393491	0.00395228	0.00372689	0.00842908	0.0377762	Bat	Picornavirus	Bat	1			Ia io picornavirus 1	0.036979	0.637122	0.206286	0.0697758	0.0029552	0.00296445	0.0027639	0.00683077	0.034323	Bat	Picornavirus	Bat	1
Ilheus virus	0.0079755	0.00722147	0.941418	0.00702819	0.00704167	0.00699776	0.00690928	0.00800557	0.00740245	Bird	Flavivirus	Bird	1			Ilheus virus	0.00465066	0.00478129	0.961952	0.00456052	0.00457083	0.00452061	0.00441621	0.00566253	0.00488547	Bird	Flavivirus	Bird	1
Impatiens necrotic spot virus	0.0274823	0.0418975	0.032521	0.0501748	0.0130964	0.0590361	0.597206	0.0234406	0.155145	Plant	Bunyavirus	Plant	1			Impatiens necrotic spot virus	0.0268551	0.0427479	0.0256435	0.0479844	0.0124572	0.0593704	0.605572	0.0234613	0.155909	Plant	Bunyavirus	Plant	1
Infectious bronchitis virus	0.0765794	0.0298122	0.772156	0.0151847	0.011698	0.0105793	0.0105326	0.0553086	0.0181496	Bird	Coronavirus	Bird	1			Infectious bronchitis virus	0.0799089	0.0311084	0.762249	0.0158449	0.0122066	0.0110393	0.0109905	0.0577133	0.0189387	Bird	Coronavirus	Bird	1
Infectious hematopoietic necrosis virus	0.00412679	0.00212795	0.0622284	0.00310054	0.914178	0.00993087	0.0015185	0.00154009	0.00124894	Fish	Rhabdovirus	Fish	1			Infectious hematopoietic necrosis virus	0.00466503	0.0024055	0.0517177	0.00350494	0.921611	0.0112261	0.00171656	0.00174097	0.00141184	Fish	Rhabdovirus	Fish	1
Ippy virus	0.00440142	0.0055707	0.00449342	0.0040898	0.00406885	0.00409433	0.0040651	0.00411424	0.965102	Rodent	Arenavirus	Rodent	1			Ippy virus	0.000976016	0.00231202	0.00109076	0.000586583	0.00056006	0.000592023	0.000554996	0.00061685	0.992711	Rodent	Arenavirus	Rodent	1
Irkut virus	0.00467639	0.959174	0.00534189	0.00680072	0.00495676	0.00495386	0.00458737	0.00473111	0.00477788	Bat	Rhabdovirus	Bat	1			Irkut virus	0.00467639	0.959174	0.00534189	0.00680072	0.00495676	0.00495386	0.00458737	0.00473111	0.00477788	Bat	Rhabdovirus	Bat	1
Isfahan virus	0.219228	0.21964	0.0572574	0.0656303	0.0956224	0.0896634	0.0261942	0.108978	0.117786	Bat	Rhabdovirus	Rodent	0			Isfahan virus	0.207872	0.237636	0.0539431	0.062297	0.106373	0.0927068	0.0257281	0.109379	0.104065	Bat	Rhabdovirus	Rodent	0
Japanese encephalitis virus	0.011753	0.00971212	0.919005	0.00964066	0.00976578	0.00986291	0.00963872	0.00985291	0.0107692	Bird	Flavivirus	Bird	1			Japanese encephalitis virus	0.011753	0.00971212	0.919005	0.00964066	0.00976578	0.00986291	0.00963872	0.00985291	0.0107692	Bird	Flavivirus	Bird	1
Jonchet virus	0.0315108	0.0509039	0.0158027	0.0157156	0.00668495	0.375243	0.022371	0.444673	0.0370956	Primate	Bunyavirus	Insect	0			Jonchet virus	0.0331323	0.0512903	0.0177762	0.0191582	0.00930483	0.375048	0.0258789	0.429552	0.0388594	Primate	Bunyavirus	Insect	0
Junin arenavirus	0.00183656	0.00547269	0.00196248	0.00212409	0.00145473	0.00161337	0.00145918	0.00183583	0.982241	Rodent	Arenavirus	Rodent	1			Junin arenavirus	0.00202976	0.00604455	0.00216906	0.00234768	0.00160786	0.0017832	0.00161278	0.00202908	0.980376	Rodent	Arenavirus	Rodent	1
Jutiapa virus	0.00808905	0.215595	0.0100848	0.00330713	0.00288516	0.00852068	0.00316029	0.0182524	0.730106	Rodent	Flavivirus	Rodent	1			Jutiapa virus	0.00828649	0.17098	0.0116806	0.00298134	0.00257092	0.00966558	0.00268012	0.0225429	0.768612	Rodent	Flavivirus	Rodent	1
J-virus	0.00744304	0.00703098	0.0076065	0.0068914	0.00671646	0.00664531	0.00684278	0.00694821	0.943875	Rodent	Paramyxovirus	Rodent	1			J-virus	0.00781509	0.00738243	0.00798671	0.0072359	0.00705226	0.00697755	0.00718489	0.00729554	0.94107	Rodent	Paramyxovirus	Rodent	1
Kama virus	0.0176844	0.00557517	0.659689	0.00283902	0.00658194	0.00395349	0.00231118	0.173343	0.128023	Bird	Flavivirus	Bird	1			Kama virus	0.0176844	0.00557517	0.659689	0.00283902	0.00658194	0.00395349	0.00231118	0.173343	0.128023	Bird	Flavivirus	Bird	1
Kamiti River virus	0.000354203	0.000496102	0.000337369	0.000423296	0.000135869	0.997638	0.000115788	0.000304887	0.000194409	Insect	Flavivirus	Insect	1			Kamiti River virus	0.000337679	0.00047255	0.000321599	0.000403274	0.000129439	0.997748	0.000110275	0.000291684	0.000185155	Insect	Flavivirus	Insect	1
Khujand virus	0.00681794	0.943683	0.00714674	0.00758022	0.00730988	0.00700084	0.0067036	0.00686413	0.00689329	Bat	Rhabdovirus	Bat	1			Khujand virus	0.00761723	0.937061	0.00799585	0.00847423	0.00814535	0.00783255	0.00750144	0.0076759	0.00769659	Bat	Rhabdovirus	Bat	1
Kimberley virus	0.706439	0.0959494	0.0199699	0.0138777	0.0131547	0.0809584	0.0129303	0.0148876	0.0418334	Artiodactyl	Rhabdovirus	Artiodactyl	1			Kimberley virus	0.706439	0.0959494	0.0199699	0.0138777	0.0131547	0.0809584	0.0129303	0.0148876	0.0418334	Artiodactyl	Rhabdovirus	Artiodactyl	1
Kyasanur forest disease virus	0.0213772	0.0047579	0.0151333	0.00272249	0.0026991	0.0029138	0.00198374	0.0357619	0.912651	Rodent	Flavivirus	Primate	0			Kyasanur forest disease virus	0.0190761	0.00422508	0.0182887	0.00214846	0.00211554	0.00306461	0.00154608	0.0429508	0.906585	Rodent	Flavivirus	Primate	0
La Crosse Virus	0.168295	0.00953637	0.650383	0.00993972	0.00703649	0.126223	0.00715347	0.0115784	0.00985485	Bird	Bunyavirus	Rodent	0			La Crosse Virus	0.145098	0.0081743	0.699474	0.00851981	0.00603128	0.108195	0.00613166	0.00992695	0.00844833	Bird	Bunyavirus	Rodent	0
Lagos bat virus	0.00119366	0.989329	0.0012395	0.00146868	0.00115454	0.00123229	0.00107635	0.00125593	0.00204966	Bat	Rhabdovirus	Bat	1			Lagos bat virus	0.00130735	0.987943	0.00163343	0.00162597	0.00160136	0.0013295	0.00118414	0.00127859	0.00209691	Bat	Rhabdovirus	Bat	1
Lassa virus	0.00477412	0.0048415	0.00475613	0.00473155	0.00472122	0.00485851	0.00474472	0.00483871	0.961734	Rodent	Arenavirus	Rodent	1			Lassa virus	0.00462629	0.00470171	0.00460307	0.00457222	0.00455956	0.00474708	0.00458402	0.0046838	0.962922	Rodent	Arenavirus	Rodent	1
Latino virus	0.0054768	0.00860366	0.00570595	0.00565224	0.00606071	0.00692384	0.00527359	0.00546067	0.950843	Rodent	Arenavirus	Rodent	1			Latino virus	0.0104209	0.0147072	0.0108224	0.0106416	0.010933	0.0120757	0.0102233	0.0103942	0.909782	Rodent	Arenavirus	Rodent	1
Leopards Hill virus	0.02399	0.0169291	0.0177061	0.0208054	0.0174232	0.0468362	0.160804	0.0467208	0.648785	Rodent	Bunyavirus	Bat	0			Leopards Hill virus	0.0190338	0.0128333	0.0138338	0.01829	0.0138811	0.0683297	0.122513	0.0990355	0.63225	Rodent	Bunyavirus	Bat	0
Lesavirus 1	0.0142943	0.259682	0.620336	0.0162243	0.0116593	0.0118825	0.0116174	0.0423435	0.0119613	Bird	Picornavirus	Primate	0			Lesavirus 1	0.0148629	0.249175	0.621983	0.0182073	0.012222	0.0122327	0.0120032	0.0468733	0.0124405	Bird	Picornavirus	Primate	0
Lesavirus 2	0.0204645	0.04068	0.015618	0.0306628	0.0127239	0.0137931	0.0121579	0.839339	0.0145607	Primate	Picornavirus	Primate	1			Lesavirus 2	0.0236062	0.0381431	0.0183151	0.0411288	0.0126843	0.0140204	0.0120681	0.820803	0.019231	Primate	Picornavirus	Primate	1
Lettuce necrotic yellows virus	0.0222022	0.0230616	0.0188191	0.0195207	0.0201791	0.0218552	0.823323	0.0213124	0.0297266	Plant	Rhabdovirus	Plant	1			Lettuce necrotic yellows virus	0.0187839	0.0211813	0.016344	0.0168462	0.0173456	0.0182832	0.846276	0.0184971	0.0264431	Plant	Rhabdovirus	Plant	1
Lettuce yellow mottle virus	0.00446594	0.00494842	0.00521734	0.00456091	0.00487395	0.0160082	0.950454	0.00447724	0.00499394	Plant	Rhabdovirus	Plant	1			Lettuce yellow mottle virus	0.00468695	0.00519564	0.00547348	0.00478637	0.00508086	0.016833	0.948025	0.00469737	0.00522125	Plant	Rhabdovirus	Plant	1
Lloviu cuevavirus	0.0190664	0.107891	0.440143	0.00220859	0.00107044	0.0591308	0.00102283	0.35505	0.0144167	Bird	Filovirus	Bat	0			Lloviu cuevavirus	0.0229895	0.139722	0.409565	0.00367384	0.00129323	0.0500415	0.00111172	0.355482	0.0161221	Bird	Filovirus	Bat	0
Loie River virus	0.00432566	0.00496486	0.00413814	0.00421403	0.00407279	0.00409323	0.00408008	0.00419611	0.965915	Rodent	Arenavirus	Rodent	1			Loie River virus	0.0047189	0.00541621	0.00451433	0.00459712	0.00444304	0.00446534	0.00445099	0.00457757	0.962816	Rodent	Arenavirus	Rodent	1
Louping ill virus	0.00605925	0.00684158	0.0173936	0.0056317	0.00608507	0.0057183	0.00550291	0.0493166	0.897451	Rodent	Flavivirus	Artiodactyl	0			Louping ill virus	0.00578383	0.0065306	0.016603	0.00537571	0.00580848	0.00545838	0.00525277	0.0470749	0.902112	Rodent	Flavivirus	Artiodactyl	0
Lujo virus	0.0202242	0.106309	0.0851345	0.0112473	0.0115426	0.0117833	0.0110876	0.0118607	0.73081	Rodent	Arenavirus	Rodent	1			Lujo virus	0.0202242	0.106309	0.0851345	0.0112473	0.0115426	0.0117833	0.0110876	0.0118607	0.73081	Rodent	Arenavirus	Rodent	1
Luna virus	0.0081931	0.00839143	0.00807164	0.00805044	0.00802747	0.00813984	0.00804372	0.0080775	0.935005	Rodent	Arenavirus	Rodent	1			Luna virus	0.0104647	0.0107195	0.0103125	0.0102858	0.0102566	0.0104003	0.0102775	0.0103199	0.916963	Rodent	Arenavirus	Rodent	1
Lunk virus NKS-1	0.00381822	0.0040912	0.00380359	0.00392896	0.00379846	0.00385726	0.00377962	0.00379988	0.969123	Rodent	Arenavirus	Rodent	1			Lunk virus NKS-1	1.47683e-05	3.89785e-05	1.69235e-05	1.4306e-05	1.04068e-05	1.48718e-05	1.027e-05	1.4956e-05	0.999865	Rodent	Arenavirus	Rodent	1
Lymphocytic choriomeningitis virus	0.00262234	0.00510408	0.00267643	0.00236041	0.00236743	0.00243201	0.00233143	0.00247033	0.977636	Rodent	Arenavirus	Rodent	1			Lymphocytic choriomeningitis virus	0.00275345	0.00535928	0.00281025	0.00247843	0.00248581	0.00255361	0.002448	0.00259384	0.976517	Rodent	Arenavirus	Rodent	1
Machupo virus	0.00629015	0.00996712	0.00621653	0.00628521	0.00618105	0.00618953	0.00618151	0.00622355	0.946465	Rodent	Arenavirus	Rodent	1			Machupo virus	0.00792672	0.0123722	0.00782581	0.00791955	0.00779166	0.00780235	0.00779223	0.00784195	0.932728	Rodent	Arenavirus	Rodent	1
Madariaga virus	0.00575973	0.00527622	0.952026	0.00567628	0.0077235	0.00533866	0.00519262	0.00636878	0.00663856	Bird	Togavirus	Bird	1			Madariaga virus	0.00774885	0.00712171	0.935286	0.00766137	0.0104214	0.00720609	0.00700947	0.00858872	0.00895649	Bird	Togavirus	Bird	1
Magpie-robin coronavirus HKU18	0.0133325	0.0105698	0.912405	0.0103103	0.0113278	0.0101228	0.0100669	0.0110966	0.0107682	Bird	Coronavirus	Bird	1			Magpie-robin coronavirus HKU18	0.0120124	0.0095129	0.921148	0.00927934	0.0101951	0.0091105	0.00906024	0.00999008	0.0096916	Bird	Coronavirus	Bird	1
Maize fine streak virus	0.018351	0.0139711	0.0123901	0.0150709	0.0167053	0.0133238	0.878807	0.0148633	0.0165175	Plant	Rhabdovirus	Plant	1			Maize fine streak virus	0.0165159	0.012574	0.0111511	0.0135644	0.0150348	0.0119915	0.890926	0.013377	0.0148658	Plant	Rhabdovirus	Plant	1
Maize Iranian mosaic virus	0.0043594	0.00459226	0.00399757	0.00466181	0.00632982	0.00462072	0.962403	0.0044163	0.00461926	Plant	Rhabdovirus	Plant	1			Maize Iranian mosaic virus	0.0055066	0.00580073	0.00504956	0.00588859	0.00799418	0.0058367	0.95251	0.00557847	0.00583473	Plant	Rhabdovirus	Plant	1
Maize mosaic virus	0.00139033	0.000868563	0.000732747	0.00142585	0.000916154	0.000733676	0.991055	0.00122327	0.00165403	Plant	Rhabdovirus	Plant	1			Maize mosaic virus	0.00124589	0.000777658	0.000655971	0.00127629	0.000821085	0.00065699	0.991989	0.00109582	0.00148175	Plant	Rhabdovirus	Plant	1
Malsoor virus	0.0200742	0.34067	0.150031	0.029994	0.0161701	0.0491184	0.0117514	0.0462598	0.33593	Bat	Bunyavirus	Bat	1			Malsoor virus	0.0233387	0.344654	0.176563	0.0359187	0.0194028	0.0589142	0.0140996	0.0534399	0.273669	Bat	Bunyavirus	Bat	1
Mamastrovirus 1	0.00736096	0.00403678	0.00734796	0.836291	0.00427829	0.00398598	0.00388305	0.128307	0.00450964	Carnivore	Astrovirus	Primate	0			Mamastrovirus 1	0.0102848	0.00560335	0.00833728	0.839555	0.00579831	0.00555065	0.00528843	0.113542	0.00604001	Carnivore	Astrovirus	Primate	0
Mamastrovirus 10	0.64139	0.0264914	0.121215	0.126785	0.0107058	0.0117657	0.0107063	0.0272264	0.0237152	Artiodactyl	Astrovirus	Carnivore	0			Mamastrovirus 10	0.626392	0.0274365	0.12648	0.131955	0.0111711	0.0122772	0.0111718	0.0284056	0.0247107	Artiodactyl	Astrovirus	Carnivore	0
Mamastrovirus 13	0.978501	0.00202139	0.00180619	0.00625559	0.00161972	0.00183112	0.0016041	0.0041824	0.00217799	Artiodactyl	Astrovirus	Artiodactyl	1			Mamastrovirus 13	0.97038	0.00252132	0.00233631	0.00969631	0.0020565	0.00219646	0.00197818	0.00616053	0.00267442	Artiodactyl	Astrovirus	Artiodactyl	1
Mamastrovirus 2	0.104691	0.00102111	0.00151039	0.822355	0.000273729	0.000361961	0.000227707	0.0528946	0.0166642	Carnivore	Astrovirus	Carnivore	1			Mamastrovirus 2	0.105239	0.000897897	0.00158206	0.855019	0.000297677	0.000389001	0.000248227	0.0179714	0.0183564	Carnivore	Astrovirus	Carnivore	1
Mamastrovirus 3	0.145102	0.0121897	0.0200195	0.752351	0.0127254	0.0114389	0.0109763	0.0221024	0.0130953	Carnivore	Astrovirus	Artiodactyl	0			Mamastrovirus 3	0.149223	0.011476	0.0192353	0.752445	0.0120619	0.010803	0.0103953	0.0218192	0.0125415	Carnivore	Astrovirus	Artiodactyl	0
Mapuera virus	0.316099	0.296328	0.00949513	0.193503	0.00738599	0.00806052	0.00739153	0.10637	0.0553663	Artiodactyl	Paramyxovirus	Bat	0			Mapuera virus	0.295757	0.319293	0.0126596	0.184488	0.0104965	0.0111498	0.0104973	0.1005	0.0551583	Bat	Paramyxovirus	Bat	1
Marburg marburgvirus	0.106376	0.502924	0.0569243	0.193208	0.0121504	0.0399302	0.0121076	0.0539548	0.0224257	Bat	Filovirus	Bat	1			Marburg marburgvirus	0.122965	0.438837	0.141139	0.163004	0.00950213	0.0323188	0.00949591	0.0616789	0.0210593	Bat	Filovirus	Bat	1
Measles virus	0.97663	0.00041282	0.000379009	0.0172062	0.000319742	0.000271906	0.000136177	0.0004998	0.00414422	Artiodactyl	Paramyxovirus	Primate	0			Measles virus	0.936464	0.00612587	0.00604675	0.0186219	0.00600804	0.00599585	0.00588966	0.00627075	0.0085769	Artiodactyl	Paramyxovirus	Primate	0
Melon yellow spot virus	0.00420092	0.00682061	0.00499993	0.00231915	0.00193742	0.00276409	0.972392	0.00205429	0.00251109	Plant	Bunyavirus	Plant	1			Melon yellow spot virus	0.00342045	0.00552898	0.00405438	0.00188404	0.00157126	0.00225277	0.97757	0.0016679	0.00205009	Plant	Bunyavirus	Plant	1
Menangle virus	0.00666086	0.947116	0.00635354	0.00787832	0.00631341	0.0063172	0.00633954	0.00651371	0.00650697	Bat	Paramyxovirus	Bat	1			Menangle virus	0.00814835	0.939783	0.00704957	0.00918482	0.00689824	0.0069122	0.00702699	0.00755287	0.00744368	Bat	Paramyxovirus	Bat	1
Menekre virus	0.00504117	0.00506408	0.00489239	0.00483049	0.00477635	0.00478647	0.0048122	0.0048981	0.960899	Rodent	Arenavirus	Rodent	1			Menekre virus	0.00180952	0.0018487	0.00161343	0.00153523	0.00146108	0.00147514	0.00151041	0.00161888	0.987128	Rodent	Arenavirus	Rodent	1
Mercadeo virus	0.0038518	0.00667992	0.00372939	0.00387226	0.00348891	0.967447	0.00329242	0.00379801	0.00384046	Insect	Flavivirus	Insect	1			Mercadeo virus	0.00513477	0.00858851	0.00497145	0.00515584	0.00465169	0.956926	0.00438989	0.00506295	0.00511936	Insect	Flavivirus	Insect	1
Merino Walk virus	0.0150778	0.0165509	0.0150637	0.0150645	0.01503	0.0150503	0.0151109	0.0151075	0.877944	Rodent	Arenavirus	Rodent	1			Merino Walk virus	0.0113833	0.0127256	0.0113685	0.0112761	0.0111504	0.0112889	0.0114345	0.0113879	0.907985	Rodent	Arenavirus	Rodent	1
Miniopterus bat coronavirus HKU8	0.071675	0.842203	0.0283561	0.00676493	0.00407412	0.0037505	0.00373726	0.0349878	0.00445156	Bat	Coronavirus	Bat	1			Miniopterus bat coronavirus HKU8	0.0927042	0.805236	0.0352248	0.00793641	0.00529094	0.00487786	0.00487404	0.0383882	0.00546801	Bat	Coronavirus	Bat	1
Miniopterus schreibersii picornavirus 1	0.0721523	0.68387	0.00681471	0.145765	0.00570055	0.00557071	0.00551639	0.0675137	0.00709666	Bat	Picornavirus	Bat	1			Miniopterus schreibersii picornavirus 1	0.0797018	0.706476	0.00876569	0.127556	0.00737608	0.00720912	0.00713885	0.0466065	0.00917009	Bat	Picornavirus	Bat	1
Mink calicivirus	0.011669	0.00899563	0.00857198	0.926697	0.00991324	0.00842004	0.00825088	0.00904644	0.00843531	Carnivore	Calicivirus	Carnivore	1			Mink calicivirus	0.00852464	0.0057338	0.00531261	0.952979	0.0066658	0.00512952	0.00492443	0.00558529	0.00514496	Carnivore	Calicivirus	Carnivore	1
Mobala virus	0.0077539	0.00951227	0.00731286	0.00745036	0.00730331	0.00733132	0.00731838	0.00754626	0.938471	Rodent	Arenavirus	Rodent	1			Mobala virus	0.00876442	0.0107081	0.00826671	0.00842209	0.0082559	0.00828755	0.00827295	0.00853045	0.930492	Rodent	Arenavirus	Rodent	1
Modoc virus	0.00950452	0.513685	0.00829398	0.00765272	0.00760574	0.00829239	0.0075563	0.00898371	0.428425	Bat	Flavivirus	Rodent	0			Modoc virus	0.00850117	0.523484	0.0071192	0.00652292	0.00647888	0.00713267	0.00643581	0.00955575	0.42477	Bat	Flavivirus	Rodent	0
Mojiang virus	0.0419123	0.60855	0.00209123	0.00490352	0.00185627	0.0018662	0.00184242	0.0164044	0.320574	Bat	Paramyxovirus	Rodent	0			Mojiang virus	0.0283109	0.632446	0.00133802	0.0034437	0.00115604	0.00117071	0.00114806	0.0232211	0.307766	Bat	Paramyxovirus	Rodent	0
Montana myotis leukoencephalitis virus	0.00713151	0.0401938	0.00625883	0.00616653	0.00588272	0.00594588	0.00587435	0.00698067	0.915566	Rodent	Flavivirus	Bat	0			Montana myotis leukoencephalitis virus	0.00713151	0.0401938	0.00625883	0.00616653	0.00588272	0.00594588	0.00587435	0.00698067	0.915566	Rodent	Flavivirus	Bat	0
Mopeia virus	0.00449677	0.00459944	0.00425453	0.00427326	0.00421049	0.00420681	0.00419784	0.00425051	0.96551	Rodent	Arenavirus	Rodent	1			Mopeia virus	0.00549221	0.00570263	0.00528127	0.00530938	0.0052521	0.00524794	0.00523669	0.00527563	0.957202	Rodent	Arenavirus	Rodent	1
Morogoro virus	0.00531425	0.00622337	0.00518197	0.00545417	0.00516684	0.00521309	0.00512004	0.00536908	0.956957	Rodent	Arenavirus	Rodent	1			Morogoro virus	0.00581544	0.00672262	0.00571323	0.00604102	0.00573161	0.00574535	0.00566346	0.00586512	0.952702	Rodent	Arenavirus	Rodent	1
Mosquito flavivirus	0.000658617	0.000755786	0.000666561	0.000789548	0.000781162	0.994125	0.000324779	0.000944137	0.000954132	Insect	Flavivirus	Insect	1			Mosquito flavivirus	0.000595899	0.000683807	0.00060308	0.000714355	0.000706766	0.994685	0.000293848	0.00085422	0.000863263	Insect	Flavivirus	Insect	1
Mossman virus	0.00649707	0.00779553	0.00422627	0.01026	0.00372276	0.00397391	0.00385757	0.481437	0.47823	Primate	Paramyxovirus	Rodent	0			Mossman virus	0.00975605	0.0119656	0.00620572	0.0215723	0.00546217	0.00569361	0.00563613	0.405747	0.527962	Rodent	Paramyxovirus	Rodent	1
Mouse astrovirus M-52/USA/2008	0.0904195	0.0194091	0.0612622	0.0732247	0.0128106	0.0134015	0.0127798	0.583849	0.132843	Primate	Astrovirus	Rodent	0			Mouse astrovirus M-52/USA/2008	0.0991927	0.0173608	0.0545447	0.06846	0.0113872	0.0119193	0.0113598	0.604981	0.120794	Primate	Astrovirus	Rodent	0
Mulberry vein banding virus	0.000159569	9.43907e-05	1.28682e-05	2.7667e-05	1.37306e-05	0.00166994	0.997898	5.35265e-05	7.00682e-05	Plant	Bunyavirus	Plant	1			Mulberry vein banding virus	0.000174471	0.000385377	3.329e-05	5.42187e-05	3.60665e-05	0.0033877	0.995559	0.000265974	0.000104013	Plant	Bunyavirus	Plant	1
Mumps virus	0.0312744	0.635761	0.00474518	0.0337508	0.000199815	0.00135906	0.000165784	0.29021	0.00253446	Bat	Paramyxovirus	Primate	0			Mumps virus	0.0283313	0.657117	0.00482547	0.030137	0.000205962	0.000948657	0.00017176	0.275873	0.00238999	Bat	Paramyxovirus	Primate	0
Munia coronavirus HKU13	0.00360018	0.00121406	0.988426	0.001277	0.000967873	0.00115608	0.00072493	0.00145262	0.00118167	Bird	Coronavirus	Bird	1			Munia coronavirus HKU13	0.00101459	0.000154534	0.998169	9.98317e-05	0.000128433	6.94303e-05	5.94523e-06	0.000314155	4.36601e-05	Bird	Coronavirus	Bird	1
Murine astrovirus	0.373417	0.0826218	0.0262025	0.0111701	0.00228231	0.00288259	0.000784651	0.0302029	0.470437	Rodent	Astrovirus	Rodent	1			Murine astrovirus	0.361505	0.0790634	0.0248313	0.0106009	0.00216341	0.00273097	0.000743356	0.0286473	0.489714	Rodent	Astrovirus	Rodent	1
Murine hepatitis virus	0.00601369	0.00503823	0.00530739	0.00535032	0.00605455	0.00469632	0.00468552	0.00964347	0.95321	Rodent	Coronavirus	Rodent	1			Murine hepatitis virus	0.00661476	0.00554205	0.0058381	0.00588532	0.00666	0.00516596	0.00515408	0.0106078	0.948532	Rodent	Coronavirus	Rodent	1
Murine norovirus	0.120868	0.00180274	0.00254564	0.00540318	0.00355279	0.00114427	0.00110872	0.00197167	0.861603	Rodent	Calicivirus	Rodent	1			Murine norovirus	0.103559	0.00194908	0.00221399	0.00594527	0.0290814	0.00114719	0.00100379	0.00233752	0.852763	Rodent	Calicivirus	Rodent	1
Murine pneumonia virus	0.0376131	0.00562004	0.00425657	0.76942	0.00192127	0.00270647	0.00200725	0.0512738	0.125181	Carnivore	Paramyxovirus	Rodent	0			Murine pneumonia virus	0.0734606	0.00963524	0.0112363	0.71379	0.00474999	0.00589887	0.00511026	0.0569876	0.119131	Carnivore	Paramyxovirus	Rodent	0
Murray Valley encephalitis virus	0.00997284	0.00798531	0.932305	0.0078533	0.00796735	0.00781388	0.00747359	0.00860987	0.0100191	Bird	Flavivirus	Bird	1			Murray Valley encephalitis virus	0.0090087	0.00644971	0.943797	0.00637294	0.00653148	0.00616916	0.00591885	0.00706654	0.00868609	Bird	Flavivirus	Bird	1
Nariva virus	0.0754575	0.0153617	0.0436776	0.0413811	0.0126164	0.01245	0.0170779	0.123137	0.658841	Rodent	Paramyxovirus	Rodent	1			Nariva virus	0.0722619	0.016668	0.0451779	0.0409202	0.0143712	0.0138116	0.0180639	0.115067	0.663659	Rodent	Paramyxovirus	Rodent	1
Newbury-1 virus	0.850742	0.00996926	0.00753947	0.0563717	0.00762953	0.00766125	0.0071342	0.0418991	0.0110535	Artiodactyl	Calicivirus	Artiodactyl	1			Newbury-1 virus	0.910037	0.00958592	0.00667223	0.0259328	0.00669017	0.00680721	0.00614167	0.0178212	0.0103122	Artiodactyl	Calicivirus	Artiodactyl	1
Newcastle disease virus	0.0115798	0.0111813	0.909771	0.0112385	0.011193	0.011144	0.0112142	0.0112309	0.0114475	Bird	Paramyxovirus	Bird	1			Newcastle disease virus	0.0125867	0.0121535	0.901925	0.0122157	0.0121663	0.012113	0.0121893	0.0122075	0.012443	Bird	Paramyxovirus	Bird	1
Night-heron coronavirus HKU19	0.00655911	0.00882677	0.930767	0.00550634	0.0182889	0.00500877	0.00471175	0.0146318	0.00569938	Bird	Coronavirus	Bird	1			Night-heron coronavirus HKU19	0.00690433	0.0092913	0.927123	0.00579615	0.0192514	0.00527239	0.00495973	0.0154019	0.00599935	Bird	Coronavirus	Bird	1
Nipah virus	0.00215479	0.88079	0.00153046	0.00174831	0.000990232	0.00111922	0.000860138	0.00219571	0.108611	Bat	Paramyxovirus	Bat	1			Nipah virus	0.00293811	0.930959	0.00203333	0.00231576	0.00126825	0.00146543	0.00115329	0.00286809	0.0549988	Bat	Paramyxovirus	Bat	1
Norovirus GI	0.0128805	0.0069717	0.00773358	0.108613	0.0039125	0.00532876	0.00401293	0.842447	0.0080995	Primate	Calicivirus	Primate	1			Norovirus GI	0.0096148	0.00491197	0.00554354	0.0972215	0.00195764	0.0030611	0.00193701	0.870407	0.00534576	Primate	Calicivirus	Primate	1
Norovirus GII	0.0167994	0.0111331	0.0110165	0.0223355	0.0109879	0.0110163	0.0109472	0.894366	0.0113983	Primate	Calicivirus	Primate	1			Norovirus GII	0.0159153	0.0105472	0.0104367	0.0211625	0.0104096	0.0104365	0.0103711	0.899923	0.0107984	Primate	Calicivirus	Primate	1
Norovirus GIII	0.232918	0.0237041	0.125433	0.504267	0.00426381	0.00315226	0.00305416	0.0847228	0.0184848	Carnivore	Calicivirus	Artiodactyl	0			Norovirus GIII	0.299263	0.0190544	0.108755	0.47475	0.00332376	0.00240799	0.00232667	0.0671243	0.0229944	Carnivore	Calicivirus	Artiodactyl	0
Norovirus GIV.1	0.0094501	0.00368044	0.00300091	0.0966366	0.00241728	0.00277135	0.00228894	0.873029	0.00672533	Primate	Calicivirus	Carnivore	0			Norovirus GIV.1	0.0139616	0.00370397	0.00266859	0.094307	0.00198285	0.00243425	0.00188429	0.871567	0.00749057	Primate	Calicivirus	Carnivore	0
Norovirus GIV.2	0.293365	0.056299	0.0938345	0.18832	0.0891332	0.0123443	0.0117013	0.226043	0.0289599	Artiodactyl	Calicivirus	Carnivore	0			Norovirus GIV.2	0.305646	0.0684792	0.0866534	0.196894	0.0814872	0.0155386	0.0139781	0.198974	0.0323496	Artiodactyl	Calicivirus	Carnivore	0
Norovirus GV	0.0196916	0.00537846	0.00510719	0.00561921	0.00507725	0.00493146	0.00491688	0.00696827	0.94231	Rodent	Calicivirus	Rodent	1			Norovirus GV	0.0198067	0.00512261	0.00486406	0.00545469	0.00525742	0.00469704	0.00468274	0.00664266	0.943472	Rodent	Calicivirus	Rodent	1
Northern cereal mosaic virus	0.0461178	0.0202711	0.00956869	0.0102115	0.0835036	0.0650257	0.72859	0.00630672	0.0304046	Plant	Rhabdovirus	Plant	1			Northern cereal mosaic virus	0.0413644	0.0292913	0.0149952	0.0163724	0.096613	0.0538826	0.706205	0.0115944	0.0296816	Plant	Rhabdovirus	Plant	1
Norwalk virus	0.0234176	0.00530571	0.00501935	0.0643769	0.00426005	0.00415508	0.00401696	0.881981	0.00746733	Primate	Calicivirus	Primate	1			Norwalk virus	0.0249918	0.005794	0.00549293	0.0697268	0.00466072	0.00453794	0.00439498	0.872282	0.00811928	Primate	Calicivirus	Primate	1
Norway rat hepacivirus 1	0.0102516	0.0110078	0.00853397	0.0188772	0.00665693	0.00601089	0.00543528	0.242422	0.690804	Rodent	Flavivirus	Rodent	1			Norway rat hepacivirus 1	0.0102516	0.0110078	0.00853397	0.0188772	0.00665693	0.00601089	0.00543528	0.242422	0.690804	Rodent	Flavivirus	Rodent	1
Norway rat hepacivirus 2	0.0395895	0.00625263	0.00866402	0.0154751	0.00501002	0.00549643	0.00409804	0.0551741	0.86024	Rodent	Flavivirus	Rodent	1			Norway rat hepacivirus 2	0.0435423	0.00688034	0.00958714	0.0170261	0.00556314	0.0060797	0.00454767	0.058225	0.848549	Rodent	Flavivirus	Rodent	1
Norway rat pegivirus	0.0857573	0.0298309	0.0150974	0.017271	0.0133428	0.0154995	0.0129515	0.248642	0.561608	Rodent	Flavivirus	Rodent	1			Norway rat pegivirus	0.086476	0.0346302	0.0203658	0.0222918	0.0180271	0.0203781	0.0176284	0.245585	0.534618	Rodent	Flavivirus	Rodent	1
Norway rat pestivirus	0.912616	0.00762782	0.00664642	0.0079555	0.00700963	0.00694927	0.00728358	0.0343599	0.00955175	Artiodactyl	Flavivirus	Rodent	0			Norway rat pestivirus	0.863187	0.0140708	0.0115782	0.0136547	0.0124469	0.011902	0.0117738	0.0460957	0.0152908	Artiodactyl	Flavivirus	Rodent	0
Ockelbo virus	0.0214035	0.0198053	0.830354	0.0210034	0.0221647	0.0238379	0.0192687	0.0210498	0.0211126	Bird	Togavirus	Bird	1			Ockelbo virus	0.0161537	0.0147119	0.873489	0.0157011	0.0164803	0.0176916	0.0142657	0.0156909	0.0158154	Bird	Togavirus	Bird	1
Ocozocoautla de Espinosa virus	0.000882791	0.11545	0.000138768	0.00011745	3.66831e-05	6.0464e-05	2.95894e-05	0.00859749	0.874687	Rodent	Arenavirus	Rodent	1			Ocozocoautla de Espinosa virus	0.0014805	0.123924	0.000372096	0.000241641	0.000103555	0.00020186	6.32866e-05	0.0115272	0.862086	Rodent	Arenavirus	Rodent	1
Oliveros virus	0.00185331	0.00217736	0.00175448	0.00205176	0.00170724	0.0016763	0.00170619	0.00176652	0.985307	Rodent	Arenavirus	Rodent	1			Oliveros virus	0.00218035	0.0025616	0.00206409	0.00241381	0.00200852	0.00197211	0.00200728	0.00207824	0.982714	Rodent	Arenavirus	Rodent	1
Omsk hemorrhagic fever virus	0.0234526	0.00864286	0.0141521	0.00789316	0.00806496	0.00803309	0.00766447	0.134913	0.787183	Rodent	Flavivirus	Rodent	1			Omsk hemorrhagic fever virus	0.0258126	0.00942985	0.0143594	0.00862573	0.00865326	0.00872848	0.0084793	0.134426	0.781485	Rodent	Flavivirus	Rodent	1
Oscivirus A1	0.0100238	0.00749523	0.685823	0.231588	0.0055491	0.00560493	0.00552644	0.0417783	0.00661179	Bird	Picornavirus	Bird	1			Oscivirus A1	0.0133403	0.0108149	0.674052	0.22586	0.00751281	0.00799922	0.00750728	0.0434599	0.00945354	Bird	Picornavirus	Bird	1
Parainfluenza virus 5	0.00497177	0.0497305	0.000123184	3.48134e-05	1.31302e-05	0.000110198	0.000102245	0.940495	0.00441901	Primate	Paramyxovirus	Carnivore	0			Parainfluenza virus 5	0.0184397	0.0652568	0.00639702	0.0058059	0.00563169	0.00646074	0.00614537	0.861685	0.0241783	Primate	Paramyxovirus	Carnivore	0
Paraiso Escondido virus	0.00394132	0.00712294	0.0154019	0.00145213	0.00206912	0.684623	0.00120385	0.194145	0.0900406	Insect	Flavivirus	Insect	1			Paraiso Escondido virus	0.00643205	0.00802969	0.0203389	0.00246527	0.002566	0.617642	0.00175603	0.260373	0.0803972	Insect	Flavivirus	Insect	1
Parana virus	0.000710373	0.00126509	0.000656267	0.00111538	0.000611987	0.000625603	0.000611828	0.000774824	0.993629	Rodent	Arenavirus	Rodent	1			Parana virus	0.000855108	0.00140381	0.000788029	0.00117923	0.000745391	0.000757749	0.000744953	0.000906881	0.992619	Rodent	Arenavirus	Rodent	1
Parramatta River virus	0.00499985	0.0619275	0.00492272	0.00475996	0.00461222	0.898261	0.00452164	0.00500518	0.0109899	Insect	Flavivirus	Insect	1			Parramatta River virus	0.0057456	0.0702469	0.00566009	0.00547343	0.0053039	0.883986	0.00519985	0.00575358	0.0126303	Insect	Flavivirus	Insect	1
Pegivirus A	0.0952056	0.0108553	0.00762043	0.00916628	0.00637432	0.00675665	0.139243	0.453444	0.271334	Primate	Flavivirus	Primate	1			Pegivirus A	0.0952056	0.0108553	0.00762043	0.00916628	0.00637432	0.00675665	0.139243	0.453444	0.271334	Primate	Flavivirus	Primate	1
Perch rhabdovirus	0.0188913	0.0616945	0.013875	0.0135087	0.766565	0.0296021	0.0104445	0.0251872	0.0602318	Fish	Rhabdovirus	Fish	1			Perch rhabdovirus	0.0205324	0.0670283	0.0150815	0.0146833	0.746348	0.0321746	0.0113527	0.027377	0.0654224	Fish	Rhabdovirus	Fish	1
Persimmon virus A	0.0144638	0.0657953	0.0114695	0.0155162	0.0117386	0.201577	0.656028	0.0119278	0.0114846	Plant	Rhabdovirus	Plant	1			Persimmon virus A	0.0159754	0.0637777	0.0123463	0.0164266	0.0125689	0.167436	0.684979	0.0133905	0.0130997	Plant	Rhabdovirus	Plant	1
Peste-des-petits-ruminants virus	0.189343	0.0152506	0.0107889	0.125063	0.0499119	0.010468	0.0111108	0.407271	0.180793	Primate	Paramyxovirus	Artiodactyl	0			Peste-des-petits-ruminants virus	0.209378	0.0144891	0.0102498	0.118817	0.050642	0.00994486	0.0105565	0.404163	0.17176	Primate	Paramyxovirus	Artiodactyl	0
Pestivirus Burdur	0.939916	0.00717809	0.00714588	0.00715668	0.00740518	0.00713514	0.00695067	0.00851211	0.00859994	Artiodactyl	Flavivirus	Artiodactyl	1			Pestivirus Burdur	0.934909	0.00777626	0.00774137	0.00775307	0.00802228	0.00772973	0.00752989	0.00922145	0.00931659	Artiodactyl	Flavivirus	Artiodactyl	1
Pestivirus Giraffe-1	0.98951	0.0010937	0.00108408	0.000563689	0.000466159	0.000823172	0.000439612	0.00461296	0.00140678	Artiodactyl	Flavivirus	Artiodactyl	1			Pestivirus Giraffe-1	0.990127	0.00102936	0.00102031	0.000530531	0.000438738	0.00077475	0.000413753	0.00434164	0.00132403	Artiodactyl	Flavivirus	Artiodactyl	1
Pestivirus strain Aydin/04-TR	0.849921	0.0181086	0.0179276	0.0178741	0.0182772	0.0183344	0.0176921	0.021161	0.0207041	Artiodactyl	Flavivirus	Artiodactyl	1			Pestivirus strain Aydin/04-TR	0.842417	0.019014	0.018824	0.0187678	0.0191911	0.0192511	0.0185767	0.022219	0.0217393	Artiodactyl	Flavivirus	Artiodactyl	1
Phacovirus Pf-CHK1/PhV	0.00729029	0.845112	0.059773	0.00832086	0.0018353	0.00206474	0.00176135	0.0705946	0.00324784	Bat	Picornavirus	Bird	0			Phacovirus Pf-CHK1/PhV	0.00696129	0.812854	0.0960344	0.00823364	0.00175188	0.00197089	0.00168129	0.0674126	0.00310024	Bat	Picornavirus	Bird	0
Phocine distemper virus	0.107802	0.00467941	0.00356769	0.68527	0.00331158	0.00394976	0.0033073	0.0497946	0.138317	Carnivore	Paramyxovirus	Carnivore	1			Phocine distemper virus	0.0824825	0.00562965	0.00436314	0.667771	0.00407646	0.0048504	0.00406881	0.0609544	0.165804	Carnivore	Paramyxovirus	Carnivore	1
Phopivirus	0.00433057	0.288148	0.684716	0.00216163	0.00138209	0.00233962	0.00142882	0.011534	0.00395903	Bird	Picornavirus	Carnivore	0			Phopivirus	0.00461733	0.267589	0.704615	0.00210778	0.00129699	0.00229185	0.00136681	0.0109142	0.0052012	Bird	Picornavirus	Carnivore	0
Pichinde arenavirus	0.00561457	0.00561208	0.00560716	0.00560728	0.00560739	0.00562026	0.00560748	0.00560846	0.955115	Rodent	Arenavirus	Rodent	1			Pichinde arenavirus	0.00474285	0.00474588	0.00473178	0.00473697	0.00472862	0.0047458	0.00472857	0.00474226	0.962097	Rodent	Arenavirus	Rodent	1
Pike fry rhabdovirus	0.00781043	0.00888105	0.00823165	0.00803592	0.930769	0.0117348	0.00763564	0.00856884	0.00833223	Fish	Rhabdovirus	Fish	1			Pike fry rhabdovirus	0.00943758	0.0107278	0.00994657	0.00971007	0.91641	0.0141196	0.00922639	0.010354	0.0100679	Fish	Rhabdovirus	Fish	1
Pirital virus	0.00165427	0.00287463	0.0017625	0.00207309	0.00155833	0.00164525	0.00154014	0.00183453	0.985057	Rodent	Arenavirus	Rodent	1			Pirital virus	0.00149672	0.00260086	0.00159464	0.00187566	0.00140992	0.00148856	0.00139346	0.00165981	0.98648	Rodent	Arenavirus	Rodent	1
Porcine astrovirus 2	0.954115	0.00480113	0.00457383	0.0114216	0.00449918	0.00446859	0.00446774	0.00689825	0.00475488	Artiodactyl	Astrovirus	Artiodactyl	1			Porcine astrovirus 2	0.934554	0.00684649	0.00653018	0.0162948	0.00642363	0.00638041	0.0063792	0.00980182	0.00678896	Artiodactyl	Astrovirus	Artiodactyl	1
Porcine astrovirus 3	0.284251	0.00873263	0.0426494	0.622214	0.00603471	0.00612435	0.00603466	0.00885792	0.0151011	Carnivore	Astrovirus	Artiodactyl	0			Porcine astrovirus 3	0.262315	0.00917447	0.0364016	0.641814	0.00584164	0.00594688	0.00585134	0.0181807	0.0144743	Carnivore	Astrovirus	Artiodactyl	0
Porcine astrovirus 4	0.931037	0.00750001	0.00774725	0.00728401	0.00595338	0.00599145	0.00592974	0.0114621	0.0170954	Artiodactyl	Astrovirus	Artiodactyl	1			Porcine astrovirus 4	0.914932	0.00866099	0.0100485	0.00995028	0.00651241	0.00670805	0.00645623	0.0150726	0.0216585	Artiodactyl	Astrovirus	Artiodactyl	1
Porcine astrovirus 5	0.225906	0.0231463	0.437684	0.0346223	0.0155786	0.0159921	0.0154975	0.0320799	0.199493	Bird	Astrovirus	Artiodactyl	0			Porcine astrovirus 5	0.216127	0.0200254	0.403306	0.0305127	0.0134551	0.0138131	0.0133849	0.0507671	0.238609	Bird	Astrovirus	Artiodactyl	0
Porcine coronavirus HKU15	0.00519296	0.00473203	0.961973	0.00466728	0.00477509	0.00473727	0.00466759	0.00467684	0.00457796	Bird	Coronavirus	Artiodactyl	0			Porcine coronavirus HKU15	0.00519296	0.00473203	0.961973	0.00466728	0.00477509	0.00473727	0.00466759	0.00467684	0.00457796	Bird	Coronavirus	Artiodactyl	0
Porcine enteric calicivirus	0.0314265	0.195431	0.0227717	0.0167931	0.00745926	0.00714634	0.00616239	0.567311	0.145499	Primate	Calicivirus	Artiodactyl	0			Porcine enteric calicivirus	0.0343339	0.194359	0.0294677	0.023687	0.0156312	0.0152368	0.0144822	0.530843	0.141959	Primate	Calicivirus	Artiodactyl	0
Porcine epidemic diarrhea virus	0.00900169	0.932094	0.00867895	0.00820269	0.00778519	0.00782622	0.00775101	0.0106587	0.00800162	Bat	Coronavirus	Artiodactyl	0			Porcine epidemic diarrhea virus	0.00714081	0.948984	0.00696072	0.00641157	0.00571149	0.00563996	0.00551888	0.00772305	0.0059091	Bat	Coronavirus	Artiodactyl	0
Porcine hemagglutinating encephalomyelitis virus	0.783698	0.00832555	0.0077395	0.00788066	0.0069813	0.00696445	0.00693598	0.162958	0.00851626	Artiodactyl	Coronavirus	Artiodactyl	1			Porcine hemagglutinating encephalomyelitis virus	0.757298	0.0096881	0.00902839	0.0091804	0.00814484	0.00812519	0.00809198	0.180516	0.00992771	Artiodactyl	Coronavirus	Artiodactyl	1
Porcine parainfluenza virus 1	0.0500955	0.0217431	0.00278576	0.00316026	0.00776016	0.00103069	0.00110338	0.499236	0.413086	Primate	Paramyxovirus	Artiodactyl	0			Porcine parainfluenza virus 1	0.0500955	0.0217431	0.00278576	0.00316026	0.00776016	0.00103069	0.00110338	0.499236	0.413086	Primate	Paramyxovirus	Artiodactyl	0
Porcine rubulavirus	0.0102829	0.572935	0.023893	0.0685054	0.00687872	0.0182716	0.00672956	0.270588	0.0219157	Bat	Paramyxovirus	Artiodactyl	0			Porcine rubulavirus	0.0105742	0.567843	0.0217759	0.0674502	0.00609702	0.0232942	0.00610259	0.269828	0.0270354	Bat	Paramyxovirus	Artiodactyl	0
Porcine torovirus	0.856103	0.0154455	0.0102637	0.0100527	0.00868619	0.00921815	0.00854806	0.0722149	0.00946802	Artiodactyl	Coronavirus	Artiodactyl	1			Porcine torovirus	0.85512	0.0152543	0.0128548	0.0110444	0.00860365	0.00929215	0.00835905	0.0692982	0.0101736	Artiodactyl	Coronavirus	Artiodactyl	1
Potato yellow dwarf virus	0.00638862	0.00631984	0.00540037	0.00602891	0.0054719	0.00725237	0.947512	0.00588107	0.00974456	Plant	Rhabdovirus	Plant	1			Potato yellow dwarf virus	0.00672487	0.00665246	0.0056846	0.00634622	0.00575989	0.00763407	0.94475	0.0061906	0.0102574	Plant	Rhabdovirus	Plant	1
Powassan virus	0.0335023	0.0219776	0.0320526	0.0208033	0.0202696	0.0204529	0.0193834	0.23185	0.599709	Rodent	Flavivirus	Rodent	1			Powassan virus	0.0302371	0.0197516	0.0287421	0.0186343	0.0181412	0.0183127	0.017345	0.273004	0.575832	Rodent	Flavivirus	Rodent	1
Pronghorn antelope pestivirus	0.931509	0.00649025	0.00793818	0.00602266	0.00741719	0.00647892	0.00571213	0.0192189	0.00921256	Artiodactyl	Flavivirus	Artiodactyl	1			Pronghorn antelope pestivirus	0.914513	0.0081869	0.0100008	0.00759283	0.00933579	0.00816192	0.00720389	0.0235498	0.0114547	Artiodactyl	Flavivirus	Artiodactyl	1
Puumala virus	0.00596933	0.00608897	0.00542727	0.00500919	0.00467913	0.00494782	0.00460195	0.00707015	0.956206	Rodent	Bunyavirus	Rodent	1			Puumala virus	0.00683403	0.00614185	0.00642026	0.00596207	0.00548243	0.00563743	0.00546751	0.00809228	0.949962	Rodent	Bunyavirus	Rodent	1
Qinghai Himalayan marmot astrovirus 1	0.313787	0.0237984	0.0430132	0.0247553	0.00245022	0.00236134	0.00244429	0.174488	0.412903	Rodent	Astrovirus	Rodent	1			Qinghai Himalayan marmot astrovirus 1	0.329811	0.0177719	0.0492677	0.035276	0.00251935	0.00274114	0.00249159	0.262761	0.29736	Artiodactyl	Astrovirus	Rodent	0
Qinghai Himalayan marmot astrovirus 2	0.109066	0.12863	0.00681447	0.388196	0.00315854	0.00306718	0.00281812	0.0161037	0.342145	Carnivore	Astrovirus	Rodent	0			Qinghai Himalayan marmot astrovirus 2	0.0947424	0.0788912	0.00576738	0.452826	0.00311792	0.00304109	0.00275976	0.0135114	0.345343	Carnivore	Astrovirus	Rodent	0
Quang Binh virus	0.00978596	0.00956763	0.00942866	0.00999161	0.00912855	0.924198	0.00896135	0.00931466	0.0096238	Insect	Flavivirus	Insect	1			Quang Binh virus	0.0112539	0.0110028	0.010843	0.0114903	0.0104978	0.912828	0.0103056	0.0107119	0.0110672	Insect	Flavivirus	Insect	1
Rabies virus isolate 13N0473AFX, complete genome.	0.00383228	0.00129016	0.00102545	0.988137	0.000910219	0.00151818	0.000917662	0.00103085	0.00133783	Carnivore	Rhabdovirus	Carnivore	1			Rabies virus isolate 13N0473AFX, complete genome.	0.00424361	0.00143286	0.00113938	0.986834	0.00101135	0.00168686	0.00101962	0.00114536	0.00148646	Carnivore	Rhabdovirus	Carnivore	1
Rabies virus isolate A10-0512, complete genome.	0.0095909	0.00912419	0.00788389	0.930961	0.00890041	0.00917621	0.00781447	0.00830826	0.00824031	Carnivore	Rhabdovirus	Carnivore	1			Rabies virus isolate A10-0512, complete genome.	0.00815101	0.00833395	0.00653093	0.941564	0.00748796	0.00761502	0.00646293	0.00692023	0.00693444	Carnivore	Rhabdovirus	Carnivore	1
Rabies virus isolate CASK2, complete genome.	0.00912476	0.00744883	0.00631302	0.94303	0.00724955	0.00751638	0.00612671	0.00633104	0.00685971	Carnivore	Rhabdovirus	Carnivore	1			Rabies virus isolate CASK2, complete genome.	0.00966151	0.007887	0.00668438	0.939679	0.00767599	0.00795852	0.00648711	0.00670346	0.00726322	Carnivore	Rhabdovirus	Carnivore	1
Rabies virus isolate IP 7841/09, complete genome.	0.00908743	0.00725964	0.0062116	0.945532	0.0065821	0.00658765	0.00624569	0.00605602	0.0064376	Carnivore	Rhabdovirus	Carnivore	1			Rabies virus isolate IP 7841/09, complete genome.	0.010869	0.00910297	0.00775603	0.931704	0.00883551	0.00824935	0.00765382	0.007628	0.00820178	Carnivore	Rhabdovirus	Carnivore	1
Rabies virus isolate NC1234, complete genome.	0.00668767	0.00707012	0.0062419	0.947709	0.00727011	0.00621675	0.0060842	0.00625439	0.00646544	Carnivore	Rhabdovirus	Carnivore	1			Rabies virus isolate NC1234, complete genome.	0.00532218	0.0061189	0.00521681	0.956232	0.00621652	0.00517698	0.00496718	0.00519718	0.00555273	Carnivore	Rhabdovirus	Carnivore	1
Rabies virus isolate R2013-01, complete genome.	0.0121477	0.0117721	0.0108071	0.908311	0.0127183	0.0109698	0.0107975	0.0110015	0.011475	Carnivore	Rhabdovirus	Carnivore	1			Rabies virus isolate R2013-01, complete genome.	0.0145766	0.0141265	0.0129685	0.889974	0.015262	0.0131638	0.012957	0.0132018	0.01377	Carnivore	Rhabdovirus	Carnivore	1
Rabies virus isolate RAC, complete genome.	0.00573526	0.00667881	0.003699	0.956224	0.00951102	0.00496399	0.00373748	0.00474579	0.00470492	Carnivore	Rhabdovirus	Carnivore	1			Rabies virus isolate RAC, complete genome.	0.00581904	0.00638791	0.00349697	0.9592	0.0083329	0.00445768	0.00344555	0.00451514	0.00434517	Carnivore	Rhabdovirus	Carnivore	1
Rabies virus isolate RV2772, complete genome.	0.00760788	0.00595574	0.0051809	0.954528	0.00535572	0.00567226	0.0050335	0.00508775	0.00557855	Carnivore	Rhabdovirus	Carnivore	1			Rabies virus isolate RV2772, complete genome.	0.00920564	0.00720952	0.00627161	0.944959	0.00648324	0.00686641	0.00609319	0.00615885	0.00675298	Carnivore	Rhabdovirus	Carnivore	1
Rabies virus isolate RV437, complete genome.	0.0118059	0.0121337	0.00831645	0.919305	0.0131859	0.00890081	0.00818258	0.00894781	0.00922145	Carnivore	Rhabdovirus	Carnivore	1			Rabies virus isolate RV437, complete genome.	0.00983826	0.0101114	0.00693037	0.932755	0.0109882	0.00741734	0.00681882	0.00745651	0.00768455	Carnivore	Rhabdovirus	Carnivore	1
Rabies virus strain 148/lib01041, complete genome	0.0105518	0.0105458	0.00876593	0.921964	0.0113028	0.00960588	0.00865486	0.0094006	0.00920841	Carnivore	Rhabdovirus	Carnivore	1			Rabies virus strain 148/lib01041, complete genome	0.00780282	0.00772609	0.00686262	0.940618	0.00804351	0.00740648	0.00684866	0.00770315	0.00698883	Carnivore	Rhabdovirus	Carnivore	1
Rat coronavirus	0.00163407	0.00177157	0.00121842	0.00189134	0.00111993	0.0010323	0.00100488	0.00281404	0.987513	Rodent	Coronavirus	Rodent	1			Rat coronavirus	0.00187134	0.00202846	0.00140091	0.0021668	0.00128518	0.00118706	0.00115556	0.00284561	0.986059	Rodent	Coronavirus	Rodent	1
Rhinolophus bat coronavirus HKU2	0.128851	0.557451	0.0308808	0.0197852	0.00656328	0.017406	0.00655102	0.223146	0.00936647	Bat	Coronavirus	Bat	1			Rhinolophus bat coronavirus HKU2	0.113366	0.55954	0.0311915	0.0213783	0.00713322	0.0189102	0.00711938	0.231188	0.0101737	Bat	Coronavirus	Bat	1
Rhinovirus A	0.0460375	0.0486849	0.0125401	0.0982363	0.0102706	0.00908858	0.00850314	0.753374	0.0132651	Primate	Picornavirus	Primate	1			Rhinovirus A	0.0513318	0.0472005	0.0071532	0.121534	0.00441455	0.00286314	0.00211562	0.755583	0.00780379	Primate	Picornavirus	Primate	1
Rhinovirus C	0.0225667	0.00834082	0.00751491	0.0112326	0.0072948	0.00776175	0.00670763	0.919925	0.00865607	Primate	Picornavirus	Primate	1			Rhinovirus C	0.025491	0.00951975	0.00868806	0.0128407	0.00844629	0.00898194	0.00776663	0.908428	0.00983791	Primate	Picornavirus	Primate	1
Rice yellow stunt virus	0.00166086	0.000312784	0.000451726	0.000511376	0.000372561	0.000884418	0.991526	0.00196086	0.0023191	Plant	Rhabdovirus	Plant	1			Rice yellow stunt virus	0.0042589	0.00163113	0.00233036	0.00217784	0.00192175	0.00236765	0.97269	0.00748039	0.00514212	Plant	Rhabdovirus	Plant	1
Rift Valley fever virus	0.0161172	0.143167	0.00889455	0.0141877	0.00482158	0.0579787	0.0046535	0.172861	0.577319	Rodent	Bunyavirus	Artiodactyl	0			Rift Valley fever virus	0.0153876	0.145116	0.00987256	0.0136664	0.00534721	0.0522971	0.00522736	0.179256	0.57383	Rodent	Bunyavirus	Artiodactyl	0
Rinderpest virus	0.185838	0.0140132	0.00724818	0.177647	0.0175447	0.00591286	0.0197	0.117407	0.454689	Rodent	Paramyxovirus	Artiodactyl	0			Rinderpest virus	0.130938	0.012121	0.0072164	0.151523	0.0151819	0.00503994	0.0151078	0.18979	0.473082	Rodent	Paramyxovirus	Artiodactyl	0
Rio Bravo virus	0.0153475	0.18665	0.00373086	0.00416942	0.00256902	0.0194606	0.00262681	0.0266564	0.73879	Rodent	Flavivirus	Bat	0			Rio Bravo virus	0.017695	0.212119	0.00431365	0.00482757	0.00297455	0.0218694	0.00304151	0.0298349	0.703325	Rodent	Flavivirus	Bat	0
Rodent hepacivirus	0.0478196	0.0145363	0.0143277	0.0232102	0.0125319	0.0161569	0.0124211	0.569429	0.289567	Primate	Flavivirus	Rodent	0			Rodent hepacivirus	0.0539304	0.0135212	0.0133166	0.0214015	0.0114785	0.0147745	0.0113518	0.584993	0.275233	Primate	Flavivirus	Rodent	0
Rodent pegivirus	0.127952	0.00518947	0.0069231	0.00361317	0.00263791	0.00195534	0.000925052	0.497753	0.353051	Primate	Flavivirus	Rodent	0			Rodent pegivirus	0.116804	0.0081013	0.0108949	0.00728951	0.00683485	0.00410534	0.00295003	0.481021	0.361999	Primate	Flavivirus	Rodent	0
Rubella virus	0.0190602	0.00874788	0.0447961	0.0230766	0.115381	0.0714978	0.00684035	0.433306	0.277295	Primate	Togavirus	Primate	1			Rubella virus	0.023076	0.00742979	0.0439414	0.0200282	0.101163	0.0633073	0.0057666	0.43523	0.300058	Primate	Togavirus	Primate	1
Sabia virus	0.00634797	0.00780727	0.00636899	0.00664759	0.00621737	0.00636088	0.00624948	0.00656433	0.947436	Rodent	Arenavirus	Rodent	1			Sabia virus	0.00539621	0.00663779	0.00541409	0.00565089	0.00528487	0.00540693	0.00531224	0.0055801	0.955317	Rodent	Arenavirus	Rodent	1
Sagiyama virus	0.0142987	0.00780689	0.456686	0.0654617	0.0136429	0.0116549	0.00725664	0.394401	0.0287919	Bird	Togavirus	Artiodactyl	0			Sagiyama virus	0.0136481	0.00715257	0.455257	0.0640368	0.0125142	0.0109648	0.00664749	0.401539	0.0282403	Bird	Togavirus	Artiodactyl	0
Salivirus CH	0.0018391	0.000212581	0.00991369	0.979131	0.00161513	7.24375e-05	3.16461e-06	0.00427306	0.00293992	Carnivore	Picornavirus	Primate	0			Salivirus CH	0.00207606	0.000163725	0.0110128	0.975754	0.00110015	9.0337e-05	2.93022e-06	0.00326289	0.0065369	Carnivore	Picornavirus	Primate	0
Salmon pancreas disease virus	0.0322506	0.00745672	0.414503	0.00956677	0.00754616	0.0220757	0.00689898	0.299071	0.200631	Bird	Togavirus	Fish	0			Salmon pancreas disease virus	0.042866	0.00814928	0.394731	0.0107022	0.00870996	0.021979	0.00688339	0.293292	0.212687	Bird	Togavirus	Fish	0
San Miguel sea lion virus 1	0.0204558	0.0022427	0.00215027	0.961311	0.00223755	0.00220618	0.0020408	0.00521222	0.00214373	Carnivore	Calicivirus	Carnivore	1			San Miguel sea lion virus 1	0.0240363	0.00263846	0.00252954	0.954513	0.0026324	0.0025955	0.00240094	0.00613179	0.00252203	Carnivore	Calicivirus	Carnivore	1
San Miguel sea lion virus 8	0.0116107	0.00893673	0.0091802	0.913925	0.0162543	0.0112764	0.00868868	0.0107985	0.00932997	Carnivore	Calicivirus	Carnivore	1			San Miguel sea lion virus 8	0.0148703	0.0113946	0.0115385	0.894212	0.0178069	0.0143473	0.0111429	0.0129252	0.0117623	Carnivore	Calicivirus	Carnivore	1
Sandfly fever Sicilian virus	0.00370169	0.653584	0.0138966	0.0040088	0.000114087	0.00218057	0.000143229	0.00460588	0.317765	Bat	Bunyavirus	Primate	0			Sandfly fever Sicilian virus	0.00437914	0.667045	0.0160692	0.00418715	0.0010396	0.00279413	0.00102801	0.00947757	0.29398	Bat	Bunyavirus	Primate	0
Sapovirus GII	0.0275016	0.00912145	0.0454051	0.0174518	0.00588649	0.0268856	0.00354489	0.857731	0.00647237	Primate	Calicivirus	Primate	1			Sapovirus GII	0.0292091	0.00968441	0.0482421	0.0185276	0.00625391	0.0285644	0.00376637	0.848876	0.00687631	Primate	Calicivirus	Primate	1
Sapovirus GIV	0.00516432	0.000968165	0.000904612	0.0109343	0.000532525	0.000572152	0.000460389	0.979157	0.00130608	Primate	Calicivirus	Primate	1			Sapovirus GIV	0.00516432	0.000968165	0.000904612	0.0109343	0.000532525	0.000572152	0.000460389	0.979157	0.00130608	Primate	Calicivirus	Primate	1
Sapovirus GV	0.07288	0.365826	0.102061	0.129925	0.01797	0.0143033	0.0140248	0.266165	0.0168442	Bat	Calicivirus	Primate	0			Sapovirus GV	0.07288	0.365826	0.102061	0.129925	0.01797	0.0143033	0.0140248	0.266165	0.0168442	Bat	Calicivirus	Primate	0
Scophthalmus maximus rhabdovirus	0.0548534	0.0912925	0.0257123	0.0194731	0.623654	0.0360825	0.0177751	0.0498713	0.0812859	Fish	Rhabdovirus	Fish	1			Scophthalmus maximus rhabdovirus	0.0524493	0.0902424	0.024722	0.0180565	0.587071	0.0539048	0.0163533	0.0642857	0.0929148	Fish	Rhabdovirus	Fish	1
Seal picornavirus type 1	0.0225586	0.0431411	0.70277	0.0191851	0.0159667	0.0815005	0.0158488	0.082399	0.0166306	Bird	Picornavirus	Carnivore	0			Seal picornavirus type 1	0.0206998	0.0489945	0.722647	0.0237132	0.0115912	0.0616694	0.0143714	0.0839445	0.0123685	Bird	Picornavirus	Carnivore	0
Semliki Forest virus	0.24685	0.00571749	0.0764793	0.0824143	0.0700865	0.00742865	0.00430531	0.405097	0.101621	Primate	Togavirus	Bird	0			Semliki Forest virus	0.241846	0.00531259	0.0908239	0.0744683	0.0635322	0.0068636	0.00395981	0.418774	0.0944192	Primate	Togavirus	Bird	0
Sendai virus	0.745382	0.00407282	0.00631076	0.00898329	0.135982	0.00658977	0.00445218	0.0818411	0.00638592	Artiodactyl	Paramyxovirus	Rodent	0			Sendai virus	0.653812	0.00971224	0.0201954	0.0193694	0.127736	0.0108764	0.0128854	0.127218	0.0181947	Artiodactyl	Paramyxovirus	Rodent	0
Seoul virus	0.00495049	0.00566922	0.011048	0.00499058	0.00484966	0.00487218	0.00484928	0.00499542	0.953775	Rodent	Bunyavirus	Rodent	1			Seoul virus	0.00470233	0.00516691	0.0049074	0.00477377	0.00468833	0.00468834	0.00468787	0.00474798	0.961637	Rodent	Bunyavirus	Rodent	1
Sepik virus	0.0027727	0.301977	0.0803088	0.00263195	0.00280824	0.257599	0.00209297	0.307073	0.0427366	Primate	Flavivirus	Artiodactyl	0			Sepik virus	0.00291848	0.317817	0.0844891	0.00277043	0.00295602	0.270816	0.00220313	0.271045	0.0449853	Bat	Flavivirus	Artiodactyl	0
Shimoni bat virus	0.00035927	0.995906	0.000287103	0.00214157	0.000311055	0.000230306	0.000156705	0.000330853	0.000277549	Bat	Rhabdovirus	Bat	1			Shimoni bat virus	0.00571508	0.953635	0.00554109	0.00708926	0.00572234	0.00561981	0.00544519	0.00568031	0.00555187	Bat	Rhabdovirus	Bat	1
Sicinivirus A	0.00295184	0.00105786	0.982312	0.00665487	0.000685516	0.000727035	0.000624551	0.00390451	0.00108178	Bird	Picornavirus	Bird	1			Sicinivirus A	0.00295184	0.00105786	0.982312	0.00665487	0.000685516	0.000727035	0.000624551	0.00390451	0.00108178	Bird	Picornavirus	Bird	1
Simian pegivirus	0.0233219	0.0090026	0.00783854	0.0110656	0.00731848	0.00902415	0.00680567	0.790913	0.13471	Primate	Flavivirus	Primate	1			Simian pegivirus	0.0217232	0.00821601	0.00726061	0.0100948	0.00668342	0.00826387	0.0062038	0.804465	0.12709	Primate	Flavivirus	Primate	1
Simian virus 41	0.00385798	0.134022	7.37103e-05	0.0331422	1.314e-05	3.2025e-05	1.26389e-05	0.82662	0.00222595	Primate	Paramyxovirus	Primate	1			Simian virus 41	0.0114768	0.26793	0.000210462	0.0352198	8.94539e-05	0.000119844	8.80308e-05	0.683215	0.0016509	Primate	Paramyxovirus	Primate	1
Sin Nombre virus	0.000584379	0.000380534	0.000467209	0.000367689	0.000439131	0.000391098	0.000363194	0.00255903	0.994448	Rodent	Bunyavirus	Rodent	1			Sin Nombre virus	0.000649219	0.000422805	0.000519112	0.000408543	0.000487923	0.000434554	0.000403549	0.00284328	0.993831	Rodent	Bunyavirus	Rodent	1
Sindbis virus	0.00590382	0.00534271	0.954453	0.00540388	0.00616046	0.00558203	0.00505773	0.00603246	0.00606405	Bird	Togavirus	Bird	1			Sindbis virus	0.00652527	0.0059051	0.949658	0.0059727	0.00680893	0.00616961	0.00559013	0.00666745	0.00670237	Bird	Togavirus	Bird	1
Siniperca chuatsi rhabdovirus	0.00123319	0.000602725	0.000299175	0.000288182	0.996039	0.000425804	0.000225596	0.000340761	0.000545836	Fish	Rhabdovirus	Fish	1			Siniperca chuatsi rhabdovirus	0.00104454	0.000557026	0.000333119	0.000242586	0.996377	0.000476044	0.000217411	0.000341309	0.000410694	Fish	Rhabdovirus	Fish	1
Skinner Tank virus	0.00278447	0.00284704	0.00246849	0.00281095	0.0027816	0.00241755	0.00239219	0.00309593	0.978402	Rodent	Arenavirus	Rodent	1			Skinner Tank virus	0.00278447	0.00284704	0.00246849	0.00281095	0.0027816	0.00241755	0.00239219	0.00309593	0.978402	Rodent	Arenavirus	Rodent	1
Snakehead virus	0.0220596	0.0966912	0.0116768	0.0270347	0.786817	0.0333966	0.00467068	0.00526821	0.0123848	Fish	Rhabdovirus	Fish	1			Snakehead virus	0.0211614	0.101774	0.00920448	0.0263071	0.791792	0.0341471	0.00241874	0.00308827	0.0101071	Fish	Rhabdovirus	Fish	1
Sokoluk virus	0.0229329	0.731679	0.0461134	0.0120117	0.0126896	0.0164431	0.0116747	0.0284651	0.117991	Bat	Flavivirus	Bat	1			Sokoluk virus	0.0239723	0.705442	0.0511074	0.0126399	0.0135405	0.0172607	0.0122035	0.030995	0.132839	Bat	Flavivirus	Bat	1
Sonchus yellow net virus	0.0312993	0.00133513	0.00107859	0.00121287	0.00322295	0.0016978	0.955795	0.00250238	0.00185572	Plant	Rhabdovirus	Plant	1			Sonchus yellow net virus	0.0312993	0.00133513	0.00107859	0.00121287	0.00322295	0.0016978	0.955795	0.00250238	0.00185572	Plant	Rhabdovirus	Plant	1
Sosuga virus	0.000918041	0.996428	0.000263364	0.00027466	0.000261209	0.000225409	0.000205398	0.000646737	0.000777019	Bat	Paramyxovirus	Bat	1			Sosuga virus	0.000918041	0.996428	0.000263364	0.00027466	0.000261209	0.000225409	0.000205398	0.000646737	0.000777019	Bat	Paramyxovirus	Bat	1
Southern elephant seal virus	0.081928	0.026336	0.747523	0.0047584	0.00579882	0.0160302	0.00218158	0.0764186	0.0390255	Bird	Togavirus	Carnivore	0			Southern elephant seal virus	0.0811947	0.0251894	0.748566	0.00454732	0.00556892	0.0153065	0.00208304	0.0739206	0.0436239	Bird	Togavirus	Carnivore	0
Sparrow coronavirus HKU17	0.683343	0.00944155	0.258589	0.00822408	0.00797645	0.00796477	0.00796191	0.00849362	0.008005	Artiodactyl	Coronavirus	Bird	0			Sparrow coronavirus HKU17	0.569435	0.00895654	0.368538	0.00856219	0.00961687	0.00790227	0.00773498	0.0112749	0.00797914	Artiodactyl	Coronavirus	Bird	0
Spodoptera frugiperda rhabdovirus	0.0414166	0.271362	0.0498974	0.0360458	0.0498193	0.0260538	0.477138	0.0258133	0.0224537	Plant	Rhabdovirus	Insect	0			Spodoptera frugiperda rhabdovirus	0.0349852	0.257373	0.0831262	0.0269155	0.0372744	0.0192112	0.469535	0.0191393	0.0524404	Plant	Rhabdovirus	Insect	0
Spring viraemia of carp virus	0.00995516	0.0126215	0.0103334	0.00894995	0.914488	0.0156175	0.00855166	0.00951482	0.0099678	Fish	Rhabdovirus	Fish	1			Spring viraemia of carp virus	0.0132942	0.0166567	0.0137686	0.011993	0.887248	0.0196742	0.0114235	0.0127047	0.0132366	Fish	Rhabdovirus	Fish	1
St. Louis encephalitis virus	0.00223788	0.00127694	0.988471	0.000656495	0.000723498	0.000904129	0.000501956	0.00110679	0.00412143	Bird	Flavivirus	Bird	1			St. Louis encephalitis virus	0.00214058	0.00122142	0.988972	0.000627952	0.000692042	0.000864819	0.000480132	0.00105867	0.00394226	Bird	Flavivirus	Bird	1
St. Valerien swine virus	0.926149	0.00686138	0.00708585	0.00785517	0.00559026	0.00595965	0.00568716	0.0112232	0.023588	Artiodactyl	Calicivirus	Artiodactyl	1			St. Valerien swine virus	0.922479	0.00720439	0.00744008	0.00824777	0.00586977	0.00625763	0.00597152	0.0117794	0.0247506	Artiodactyl	Calicivirus	Artiodactyl	1
Steller sea lion vesivirus	0.011408	0.0067253	0.0061517	0.942619	0.00777855	0.0062263	0.00601315	0.00695733	0.00612073	Carnivore	Calicivirus	Carnivore	1			Steller sea lion vesivirus	0.0108376	0.00638903	0.00584412	0.945488	0.00738963	0.00591499	0.00571249	0.00660946	0.00581469	Carnivore	Calicivirus	Carnivore	1
Sunguru virus	0.0532248	0.576398	0.0242223	0.0262396	0.128771	0.0446796	0.0204617	0.0257707	0.100232	Bat	Rhabdovirus	Bird	0			Sunguru virus	0.0476663	0.627891	0.0223871	0.0225729	0.111336	0.0424431	0.0175427	0.0221101	0.0860513	Bat	Rhabdovirus	Bird	0
Tacaribe virus	0.0134251	0.0122025	0.012226	0.0120869	0.012077	0.0120827	0.0120754	0.0126976	0.901127	Rodent	Arenavirus	Bat	0			Tacaribe virus	0.0117561	0.010912	0.0109448	0.0106164	0.0106137	0.0106613	0.0106141	0.0111323	0.912749	Rodent	Arenavirus	Bat	0
Tailam virus	0.0393241	0.0131714	0.00931221	0.0182994	0.0102242	0.00906419	0.0092765	0.0355744	0.855754	Rodent	Paramyxovirus	Rodent	1			Tailam virus	0.043342	0.0145394	0.0102883	0.0202231	0.0113001	0.0100183	0.0102526	0.0392339	0.840802	Rodent	Paramyxovirus	Rodent	1
Tamana bat virus	0.0964477	0.136128	0.0279771	0.0533669	0.000184788	0.652125	0.00022064	0.0158853	0.0176644	Insect	Flavivirus	Bat	0			Tamana bat virus	0.144243	0.132686	0.0408854	0.105888	0.00509845	0.463027	0.00521839	0.0516736	0.05128	Insect	Flavivirus	Bat	0
Tamiami virus	0.0111656	0.0130662	0.0106014	0.0106571	0.0107375	0.0113246	0.0106715	0.0109294	0.910847	Rodent	Arenavirus	Rodent	1			Tamiami virus	0.0123409	0.0144415	0.0117173	0.0117789	0.0118678	0.0125167	0.0117948	0.0120799	0.901462	Rodent	Arenavirus	Rodent	1
Taro vein chlorosis virus	0.0085968	0.00707491	0.0060267	0.00649751	0.00615747	0.00693852	0.942952	0.00798832	0.00776731	Plant	Rhabdovirus	Plant	1			Taro vein chlorosis virus	0.00744808	0.00608215	0.00516421	0.00558583	0.00530948	0.00608461	0.950146	0.00734356	0.00683577	Plant	Rhabdovirus	Plant	1
Tench rhabdovirus S64	0.00676564	0.00763554	0.00691962	0.00639113	0.944433	0.00868418	0.00627998	0.00640379	0.00648687	Fish	Rhabdovirus	Fish	1			Tench rhabdovirus S64	0.0114868	0.0123997	0.011762	0.0110904	0.906622	0.0134206	0.0109341	0.0110516	0.0112323	Fish	Rhabdovirus	Fish	1
Thrush coronavirus HKU12	0.00463344	0.00399264	0.968279	0.00414699	0.00370626	0.00372792	0.00366408	0.0040236	0.00382633	Bird	Coronavirus	Bird	1			Thrush coronavirus HKU12	0.00521249	0.00449171	0.964314	0.00466529	0.00416954	0.00419391	0.00412209	0.00452653	0.00430457	Bird	Coronavirus	Bird	1
Tibrogargan virus	0.89128	0.0187639	0.0106107	0.0122449	0.0112564	0.0180948	0.00973964	0.0151288	0.0128811	Artiodactyl	Rhabdovirus	Artiodactyl	1			Tibrogargan virus	0.891041	0.0196343	0.00966494	0.0118787	0.0113431	0.0200195	0.00931474	0.0140299	0.0130738	Artiodactyl	Rhabdovirus	Artiodactyl	1
Tick-borne encephalitis virus	0.526991	0.00555795	0.0271609	0.00530352	0.00573049	0.00455339	0.00431577	0.0840104	0.336377	Artiodactyl	Flavivirus	Rodent	0			Tick-borne encephalitis virus	0.705842	0.00316394	0.0210474	0.00250023	0.0028197	0.00214277	0.00200038	0.067931	0.192552	Artiodactyl	Flavivirus	Rodent	0
Tioman virus	0.00594105	0.954661	0.00624996	0.00552491	0.00539233	0.00535351	0.00533197	0.00574886	0.00579605	Bat	Paramyxovirus	Bat	1			Tioman virus	0.00678976	0.948184	0.00714281	0.00631415	0.00616266	0.0061183	0.00609368	0.00657013	0.00662406	Bat	Paramyxovirus	Bat	1
Tomato spotted wilt virus	0.00560745	0.000694965	6.87557e-05	0.00184256	1.42593e-05	0.0177842	0.886044	8.57026e-05	0.0878578	Plant	Bunyavirus	Plant	1			Tomato spotted wilt virus	0.00790462	0.00564507	0.00411263	0.00541336	0.0028842	0.0173429	0.830795	0.00461403	0.121288	Plant	Bunyavirus	Plant	1
Tomato zonate spot virus	0.00544674	0.00539817	0.00484848	0.0049537	0.00487207	0.00593321	0.958054	0.00489175	0.00560192	Plant	Bunyavirus	Plant	1			Tomato zonate spot virus	0.00544674	0.00539817	0.00484848	0.0049537	0.00487207	0.00593321	0.958054	0.00489175	0.00560192	Plant	Bunyavirus	Plant	1
Tonto creek virus	0.00568133	0.00668166	0.00547865	0.0056844	0.00549815	0.00555626	0.00541563	0.00612066	0.953883	Rodent	Arenavirus	Rodent	1			Tonto creek virus	0.00511321	0.0060135	0.00493078	0.00511596	0.00494834	0.00500064	0.00487407	0.0055086	0.958495	Rodent	Arenavirus	Rodent	1
Tuhoko virus 1	0.00877505	0.941568	0.0141109	0.00651512	0.00490685	0.00593854	0.0048699	0.00661074	0.00670512	Bat	Paramyxovirus	Bat	1			Tuhoko virus 1	0.00914067	0.939133	0.0146989	0.00678658	0.0051113	0.00618598	0.00507281	0.00688618	0.0069845	Bat	Paramyxovirus	Bat	1
Tuhoko virus 2	0.00729374	0.939103	0.00731861	0.0103142	0.00697441	0.00701428	0.00694659	0.00751767	0.00751708	Bat	Paramyxovirus	Bat	1			Tuhoko virus 2	0.00505115	0.956252	0.00496695	0.00848669	0.00477703	0.00485417	0.00476877	0.00537194	0.00547148	Bat	Paramyxovirus	Bat	1
Tuhoko virus 3	0.00142659	0.988913	0.00168795	0.00129826	0.000910455	0.00109601	0.000841806	0.00235101	0.00147481	Bat	Paramyxovirus	Bat	1			Tuhoko virus 3	0.00142659	0.988913	0.00168795	0.00129826	0.000910455	0.00109601	0.000841806	0.00235101	0.00147481	Bat	Paramyxovirus	Bat	1
Tula virus	0.0134821	0.0132278	0.0190173	0.013077	0.012842	0.0129117	0.0128616	0.0142251	0.888355	Rodent	Bunyavirus	Rodent	1			Tula virus	0.0151518	0.014947	0.0218371	0.0148714	0.0146005	0.0146165	0.0146237	0.0160883	0.873264	Rodent	Bunyavirus	Rodent	1
Tulane virus	0.082586	0.0244758	0.00949972	0.188578	0.00613072	0.00716968	0.00583818	0.600857	0.0748644	Primate	Calicivirus	Primate	1			Tulane virus	0.0778621	0.0285254	0.0102645	0.214451	0.00702061	0.0081503	0.00667013	0.571156	0.0759	Primate	Calicivirus	Primate	1
Turkey calicivirus	0.0164411	0.0111416	0.754876	0.0104837	0.0364438	0.00666223	0.00627778	0.14572	0.0119535	Bird	Calicivirus	Bird	1			Turkey calicivirus	0.0164411	0.0111416	0.754876	0.0104837	0.0364438	0.00666223	0.00627778	0.14572	0.0119535	Bird	Calicivirus	Bird	1
Turkey enteric coronavirus	0.010346	0.0175477	0.925633	0.00652731	0.00452247	0.00386318	0.00382987	0.0216812	0.00604944	Bird	Coronavirus	Bird	1			Turkey enteric coronavirus	0.0152551	0.0289452	0.898443	0.00872963	0.00629108	0.0050836	0.00488718	0.0228499	0.0095148	Bird	Coronavirus	Bird	1
Tyuleniy virus	0.0321903	0.0029926	0.321125	0.000348954	0.000867843	0.0127097	0.000329127	0.0466518	0.582785	Rodent	Flavivirus	Bird	0			Tyuleniy virus	0.0357402	0.00627352	0.310935	0.00296741	0.00496464	0.0165306	0.00272862	0.0497471	0.570113	Rodent	Flavivirus	Bird	0
Una virus	0.0706296	0.010772	0.571104	0.0369821	0.146129	0.0120482	0.0104222	0.0529082	0.0890045	Bird	Togavirus	Primate	0			Una virus	0.0730084	0.0103879	0.556861	0.0362055	0.157845	0.0116453	0.0100502	0.0525881	0.0914083	Bird	Togavirus	Primate	0
Usutu virus	0.00430569	0.00387053	0.968166	0.00382509	0.00379836	0.00405177	0.00379318	0.00409602	0.00409373	Bird	Flavivirus	Bird	1			Usutu virus	0.00559721	0.00503169	0.958616	0.00497261	0.00493786	0.00526729	0.00493114	0.00532457	0.00532125	Bird	Flavivirus	Bird	1
Venezuelan equine encephalitis virus	0.00230125	0.00211055	0.980717	0.00180756	0.00280925	0.00194512	0.00162666	0.00235864	0.00432443	Bird	Togavirus	Rodent	0			Venezuelan equine encephalitis virus	0.00536481	0.00454167	0.949637	0.00461771	0.00822133	0.00425007	0.00353126	0.0119906	0.00784575	Bird	Togavirus	Rodent	0
Vesicular exanthema of swine virus	0.00134672	0.00163912	0.00134423	0.987339	0.00193563	0.00141004	0.001191	0.00230613	0.00148788	Carnivore	Calicivirus	Artiodactyl	0			Vesicular exanthema of swine virus	0.00267615	0.00286811	0.0026946	0.976818	0.00344022	0.00263689	0.00237823	0.00376732	0.00272068	Carnivore	Calicivirus	Artiodactyl	0
Vesicular stomatitis Alagoas virus	0.943001	0.00727934	0.00666148	0.00667467	0.00713702	0.00767547	0.00666934	0.00766132	0.00724015	Artiodactyl	Rhabdovirus	Artiodactyl	1			Vesicular stomatitis Alagoas virus	0.932834	0.00864964	0.0079499	0.0079383	0.00848225	0.00858958	0.00794358	0.00900681	0.00860597	Artiodactyl	Rhabdovirus	Artiodactyl	1
Vesicular stomatitis Indiana virus	0.891782	0.0162517	0.0135136	0.0126704	0.0139745	0.0129479	0.0124375	0.0131004	0.013322	Artiodactyl	Rhabdovirus	Artiodactyl	1			Vesicular stomatitis Indiana virus	0.887453	0.0169017	0.0140541	0.0131772	0.0145335	0.0134658	0.012935	0.0136244	0.0138549	Artiodactyl	Rhabdovirus	Artiodactyl	1
Vesicular stomatitis New Jersey virus	0.926528	0.012647	0.00851211	0.00851699	0.0090386	0.00874545	0.00790035	0.0094429	0.00866857	Artiodactyl	Rhabdovirus	Artiodactyl	1			Vesicular stomatitis New Jersey virus	0.919853	0.0137933	0.00928592	0.00929126	0.00986025	0.00954023	0.00861856	0.0103013	0.00945661	Artiodactyl	Rhabdovirus	Artiodactyl	1
Vesivirus ferret badger	0.00655397	0.00550192	0.00526099	0.951314	0.0054855	0.00519878	0.00489105	0.0104379	0.00535602	Carnivore	Calicivirus	Carnivore	1			Vesivirus ferret badger	0.00696479	0.00590115	0.00562585	0.947999	0.00589834	0.00557765	0.00526487	0.0110211	0.00574689	Carnivore	Calicivirus	Carnivore	1
Viral hemorrhagic septicemia virus	0.0168057	0.031219	0.0157023	0.0217171	0.850057	0.0166507	0.0147604	0.0162318	0.0168556	Fish	Rhabdovirus	Fish	1			Viral hemorrhagic septicemia virus	0.017646	0.03278	0.0164875	0.022803	0.84256	0.0174832	0.0154984	0.0170434	0.0176984	Fish	Rhabdovirus	Fish	1
Walrus calicivirus	0.016426	0.0117912	0.0116265	0.897684	0.0141048	0.0116372	0.0114659	0.0135576	0.0117071	Carnivore	Calicivirus	Carnivore	1			Walrus calicivirus	0.0147337	0.00974844	0.00959827	0.913779	0.0119971	0.00958794	0.00943521	0.0114966	0.00962399	Carnivore	Calicivirus	Carnivore	1
Watermelon silver mottle virus	0.010763	0.0114244	0.0105086	0.010771	0.0105333	0.011933	0.911384	0.0106545	0.0120283	Plant	Bunyavirus	Plant	1			Watermelon silver mottle virus	0.0112397	0.0119716	0.0110154	0.0112788	0.0110427	0.0122436	0.907573	0.0111405	0.0124951	Plant	Bunyavirus	Plant	1
Wenzhou virus	0.00504808	0.00518149	0.005025	0.00502358	0.00512446	0.00502272	0.00501849	0.00503628	0.95952	Rodent	Arenavirus	Rodent	1			Wenzhou virus	0.00572964	0.00587892	0.00570032	0.00570222	0.00582068	0.00570345	0.00570001	0.00571602	0.954049	Rodent	Arenavirus	Rodent	1
West Caucasian bat virus	0.00575025	0.944357	0.00689868	0.0091893	0.0105363	0.00620599	0.00533091	0.0057836	0.00594762	Bat	Rhabdovirus	Bat	1			West Caucasian bat virus	0.00554826	0.949562	0.00691983	0.00633246	0.00939785	0.00581019	0.00512443	0.00558567	0.00571895	Bat	Rhabdovirus	Bat	1
West Nile virus	0.00633389	0.00673177	0.950553	0.0058395	0.00578481	0.00603571	0.00578303	0.00662459	0.00631378	Bird	Flavivirus	Bird	1			West Nile virus	0.00977591	0.00851054	0.932928	0.0076299	0.00755089	0.00858771	0.00729465	0.00900139	0.00872145	Bird	Flavivirus	Bird	1
Western equine encephalitis virus	0.0107056	0.00987107	0.915734	0.0102157	0.00996362	0.0120781	0.0096881	0.0111625	0.0105815	Bird	Togavirus	Bird	1			Western equine encephalitis virus	0.0117744	0.0108986	0.907077	0.0112578	0.0109968	0.0133239	0.010702	0.0123122	0.0116569	Bird	Togavirus	Bird	1
Whataroa virus	0.00189698	0.000861592	0.987983	0.000821148	0.00134509	0.00480011	0.000608263	0.000782792	0.000901445	Bird	Togavirus	Bird	1			Whataroa virus	0.00210955	0.000942833	0.986959	0.000906414	0.00148845	0.00502246	0.000681725	0.000875669	0.00101382	Bird	Togavirus	Bird	1
White bream virus	0.0210802	0.219902	0.0145828	0.0228918	0.437442	0.0749908	0.0158441	0.178699	0.0145679	Fish	Coronavirus	Fish	1			White bream virus	0.0210216	0.270689	0.0129025	0.0186796	0.393246	0.0589514	0.0178446	0.194426	0.0122393	Fish	Coronavirus	Fish	1
White-eye coronavirus HKU16	0.00310213	0.00153008	0.985364	0.00136483	0.00105182	0.000858402	0.0009462	0.00460243	0.00117994	Bird	Coronavirus	Bird	1			White-eye coronavirus HKU16	0.00293887	0.00144955	0.986134	0.001293	0.000996456	0.000813223	0.0008964	0.00436019	0.00111784	Bird	Coronavirus	Bird	1
Whitewater arroyo virus	0.000864871	0.00140558	0.000563013	0.000790934	0.000451772	0.000433754	0.000494867	0.00065033	0.994345	Rodent	Arenavirus	Rodent	1			Whitewater arroyo virus	0.00116217	0.00200755	0.00105073	0.00112886	0.000716151	0.000708029	0.00088414	0.000944436	0.991398	Rodent	Arenavirus	Rodent	1
Wigeon coronavirus HKU20	0.00195727	0.00724604	0.980592	0.000676685	0.000666894	0.000505982	0.000573143	0.00552844	0.00225335	Bird	Coronavirus	Bird	1			Wigeon coronavirus HKU20	0.00212746	0.00787613	0.978905	0.000735528	0.000724885	0.000549981	0.000622981	0.00600915	0.0024493	Bird	Coronavirus	Bird	1
Yellow fever virus	0.0123673	0.0922283	0.0144185	0.0062531	0.00629565	0.0580309	0.00613503	0.00790325	0.796368	Rodent	Flavivirus	Primate	0			Yellow fever virus	0.0129294	0.0964205	0.0150736	0.00653733	0.00658182	0.0590102	0.00641389	0.00826247	0.788771	Rodent	Flavivirus	Primate	0
Yokose virus	0.00996826	0.862455	0.0395655	0.00651848	0.00565351	0.0281042	0.00549984	0.0190931	0.0231418	Bat	Flavivirus	Bat	1			Yokose virus	0.00846826	0.87222	0.0360286	0.00675599	0.00618924	0.0309934	0.00613082	0.0167433	0.0164708	Bat	Flavivirus	Bat	1
Zaire ebolavirus	0.0795414	0.607688	0.117743	0.069199	0.00844719	0.0307107	0.00599432	0.0696606	0.0110157	Bat	Filovirus	Bat	1			Zaire ebolavirus	0.0823562	0.603636	0.108187	0.0658969	0.0104564	0.0358513	0.00853608	0.0718341	0.0132456	Bat	Filovirus	Bat	1
Supplementary Table 5. Analysis of GT only (a) versus GT and MSP combined (b), without PN, showed that the average of the best ten performances improved from 70.9% to 73.5%
(a) Model_GT
accuracy.st3	Artiodactyl	Bat	Bird	Carnivore	Fish	Insect	Plant	Primate	Rodent	modelid
0.75	0.8	0.444444	1	0.5	1	0.666667	0.666667	0.75	0.818182	35
0.738462	0.6	0.888889	0.909091	0.333333	1	0.333333	1	0.625	0.833333	10
0.734375	0.5	0.888889	0.909091	0.666667	1	0.333333	1	0.75	0.636364	40
0.723077	0.8	0.333333	0.818182	0.666667	0.333333	0.666667	1	0.75	0.916667	25
0.709677	0.8	0.555556	1	0.8	0.5	0	1	0.75	0.545455	17
0.703125	0.6	0.666667	0.727273	0.5	1	1	0.666667	0.75	0.75	27
0.692308	0.6	0.888889	0.636364	0.5	0.666667	0	1	0.875	0.75	13
0.6875	0.777778	0.777778	0.727273	0.333333	0.333333	0	0.666667	0.75	0.916667	44
0.676923	0.6	0.555556	0.636364	0.833333	0.666667	0.666667	1	0.5	0.833333	11
0.676923	0.7	0.666667	0.818182	0.666667	0.666667	0.666667	1	0.5	0.583333	12
(b) Model_GT_MSP
accuracy.st3	Artiodactyl	Bat	Bird	Carnivore	Fish	Insect	Plant	Primate	Rodent	modelid
0.8	0.7	1	0.818182	0.666667	0.666667	0.666667	1	0.75	0.833333	15
0.75	0.7	0.666667	0.727273	0.666667	0.666667	1	1	0.5	1	43
0.738462	0.7	0.666667	0.909091	1	0.333333	0.666667	1	0.5	0.75	29
0.734375	0.7	0.888889	0.909091	0.666667	0.666667	0.666667	0.666667	0.375	0.818182	17
0.734375	0.8	0.666667	0.727273	0.666667	0.666667	0.333333	1	0.75	0.818182	20
0.734375	0.6	0.777778	0.909091	0.5	1	0	1	0.875	0.727273	36
0.730159	0.555556	0.666667	0.818182	0.666667	0.666667	0.666667	1	0.75	0.818182	30
0.730159	0.666667	0.888889	0.818182	0.666667	0	0.333333	1	0.875	0.727273	47
0.707692	0.7	0.777778	0.909091	0.5	0.666667	0.333333	1	0.75	0.583333	35
0.692308	0.7	0.777778	0.727273	0.666667	0.666667	0.333333	1	0.375	0.833333	7
